1 **Neanderthal introgression reintroduced functional alleles lost in the human out of Africa**  
2 **bottleneck**

3 David C. Rinker<sup>1</sup>, Corinne N. Simonti<sup>2,3</sup>, Evonne McArthur<sup>3,4</sup>, Douglas Shaw<sup>3,5</sup>, Emily Hodges<sup>3,5</sup>, and  
4 John A. Capra<sup>1,3,6,†</sup>

5  
6 <sup>1</sup> Department of Biological Sciences, Vanderbilt University, Nashville, TN, 37235, USA

7 <sup>2</sup> Department of Biological Sciences, Georgia Institute of Technology, Atlanta, GA, 30332, USA

8 <sup>3</sup> Vanderbilt Genetics Institute, Vanderbilt University, Nashville, TN 37235, USA

9 <sup>4</sup> Medical Scientist Training Program, Vanderbilt University, Nashville, TN 37235, USA

10 <sup>5</sup> Department of Biochemistry, Vanderbilt University, Nashville, TN, 37235, USA

11 <sup>6</sup> Departments of Biomedical Informatics and Computer Science, Vanderbilt University, Nashville,  
12 TN, 37235, USA

13  
14 <sup>†</sup> Correspondence: [tony.capra@vanderbilt.edu](mailto:tony.capra@vanderbilt.edu)

15  
16 **ABSTRACT**

17 Neanderthal ancestry remains across modern Eurasian genomes, and introgressed sequences  
18 influence diverse phenotypes, including immune, skin, and neuropsychiatric diseases.  
19 Interpretation of introgressed sequences has focused on alleles derived in the Neanderthal lineage.  
20 Here, we demonstrate that Neanderthal introgression also reintroduced thousands of ancestral  
21 hominin alleles lost in the Eurasian out of Africa bottleneck. Combining evolutionary simulations,  
22 expression quantitative trait loci (eQTL), massively parallel reporter assay (MPRA) data, and *in*  
23 *vitro* validation, we show that reintroduced alleles (RAs) have different fitness effects than  
24 Neanderthal-derived alleles (NDAs) and that some RAs regulate gene expression independent of  
25 NDAs. Illustrating the broad potential influence of RAs, we find that over 70% of known  
26 phenotype associations with NDAs are equally associated with RAs. Finally, we discover  
27 enrichment for RA eQTL activity in several tissues, with strongest enrichment in the brain. In  
28 summary, our study reveals that Neanderthal introgression supplied Eurasians with many lost  
29 functional variants and demonstrates that RAs must be considered when evaluating the effects of  
30 introgression.

31  
32 **ONE SENTENCE SUMMARY**

33 Neanderthal interbreeding with modern humans restored to Eurasians, hundreds of thousands of  
34 ancient alleles that were lost in the out of Africa bottleneck.

35

## 36 MAIN TEXT

37 Modern Eurasian populations have significantly lower genetic diversity than modern African  
38 populations, despite having larger census population sizes (1, 2). This disparity reflects the severe  
39 genetic bottleneck experienced by the direct ancestors of Eurasian anatomically modern humans  
40 (AMH) as they moved out of Africa approximately 50,000 years ago (2, 3). The effective  
41 population size of this ancestral Eurasian population is estimated to have been less than 20% of the  
42 size of the contemporaneous African population (1, 4). As a result of this bottleneck, millions of  
43 ancient alleles were lost in the ancestors of Eurasians.

44 More than 500,000 years prior to the Eurasian out of Africa (OOA) bottleneck, members  
45 of other hominin groups in Africa, including the ancestors of Neanderthals and Denisovans,  
46 also moved into Eurasia (5). Neanderthals and other descendants of these groups inhabited  
47 large parts of Eurasia for hundreds of thousands of years prior to the Eurasian OOA  
48 migration. The sequencing of ancient DNA from Neanderthal and Denisovan individuals has  
49 enabled reconstruction of their genomes (5-7). Comparing Neanderthal genomes to genomes  
50 of modern humans from around the world revealed that Eurasian AMHs interbred with  
51 Neanderthals approximately 50,000 years ago (5, 8). The legacy of this archaic introgression is  
52 reflected in the genomes of modern Eurasians, where 1-3% of DNA sequence in individuals  
53 is of Neanderthal ancestry (9-12).

54 Neanderthal introgression introduced many new alleles into Eurasian populations that  
55 were derived on the Neanderthal lineage. It has been hypothesized that some of these alleles  
56 were adapted to non-African environments and thus were beneficial to Eurasian AMH (9, 10,  
57 13-18). However, Neanderthal interbreeding also likely came with a genetic cost due to  
58 accumulation of weakly deleterious alleles in their lineage, because of their lower effective  
59 population size compared to AMHs (19, 20). Indeed, the distribution of archaic ancestry  
60 across modern Eurasian genomes is non-random, with significant deserts of Neanderthal  
61 ancestry as well as many genomic regions in which Neanderthal ancestry is common. This  
62 distribution is generally attributed to the long term effects of positive and negative selection  
63 acting on introgressed Neanderthal alleles (9, 10, 21), with negative selection acting most  
64 strongly immediately after admixture (22).

65 For those Neanderthal haplotypes that remain in modern Eurasian populations,  
66 introgressed alleles are associated with diverse traits, including risk for skin, immune, and  
67 neuropsychiatric diseases (13, 14, 23-26). Notably, an introgressed Neanderthal haplotype at  
68 the *OAS1* locus influences innate immune response; however, this haplotype also contains an  
69 ancient hominin allele in high linkage disequilibrium (LD) with the Neanderthal alleles that  
70 could influence function (27). Thus, while most studies have focused on identifying and testing  
71 the effects of Neanderthal derived alleles in AMHs, archaic admixture may also have served as  
72 a route by which more ancient functional alleles reentered the genomes of Eurasians (27, 28).

73 Here, we explore the hypothesis that Neanderthal introgression reintroduced into  
74 Eurasians functional alleles lost in the Eurasian OOA bottleneck. To evaluate this hypothesis,  
75 we analyze archaic, modern, and simulated genomes to characterize the prevalence and  
76 functional influence of the reintroduction of alleles lost in the Eurasian OOA bottleneck. Our  
77 results conservatively identify more than 200,000 lost alleles that were reintroduced on  
78 introgressed Neanderthal haplotypes in modern Eurasian populations. We demonstrate  
79 functional effects for many reintroduced alleles using computational analyses, cross-population  
80 comparisons of eQTL, and MPRA data. We then experimentally validate the gene regulatory  
81 effects of a reintroduced allele independent of associated Neanderthal alleles in the context of

82 both African and Eurasian haplotypes. Finally, we discover enrichment for reintroduced alleles  
83 among introgressed alleles with gene regulatory effects in several tissues, including the brain. Taken  
84 together, our results demonstrate that Neanderthal populations served as reservoirs of functional  
85 ancestral alleles that were lost to Eurasian ancestors in the OOA bottleneck, and that some of  
86 these alleles have functional effects in Eurasians after being reintroduced by Neanderthal  
87 admixture.

88  
89  
90 **RESULTS**

91 To illustrate the evolutionary scenarios we investigate here, consider the simple model of recent  
92 hominin demography presented in **Figure 1A**. Many alleles segregating in ancestral hominins were  
93 lost to Eurasians in the OOA bottleneck. However, some of these alleles were likely maintained in  
94 Neanderthal populations whose ancestors also split from this hominin lineage, nearly half a million  
95 years before the ancestors of Eurasians. These alleles thus had the potential to be reintroduced  
96 into Eurasian populations via archaic admixture. Within these populations, reintroduced alleles  
97 would initially only be present on introgressed Neanderthal haplotypes, and over time many would  
98 retain high LD with Neanderthal-derived alleles in modern Eurasians. In the following, we will  
99 refer to alleles that were present in the most recent common ancestor of AMHs and Neanderthals  
100 as “ancestral hominin alleles.” We will refer to introgressed alleles that were present in this  
101 ancestral population, but lost in Eurasians as reintroduced alleles (RAs). We will refer to  
102 introgressed alleles that first appeared on the Neanderthal lineage as Neanderthal-derived alleles  
103 (NDAs) (**Figure 1B**). In the following analyses, we evaluate the presence and function of RAs in  
104 modern Eurasians.

105

### 106 **Neanderthal introgression likely reintroduced alleles lost in the Eurasian OOA bottleneck**

107 To explore the likelihood of the reintroduction of alleles lost in the OOA bottleneck via archaic  
108 introgression, we performed forward-time evolutionary simulations. Our demographic model  
109 follows the trajectories of variants from an ancestral hominin population through the splitting off of  
110 ancestral Neanderthals, the Eurasian human OOA bottleneck, Neanderthal introgression into the  
111 early Eurasian population, and finally the exponential growth of the modern Eurasian population  
112 (**Figure S1**). Our model uses linkage architectures, mutation rates, and demographic characteristics  
113 described previously (20).

114 These simulations consistently showed that under two archaic admixture fractions ( $f=0.02$  and  
115  $0.04$ ), between one and two percent of ancestral hominin alleles segregating in modern Eurasians  
116 were present exclusively through reintroduction by Neanderthal introgression (**Table S1**). We  
117 estimated the frequency of false signatures of reintroduction due to confounding mutations within  
118 the Neanderthal lineage that match an allele lost in the Eurasian OOA; such convergent mutations  
119 are extremely rare ( $<0.0006\%$  of RAs; **Figure S2**, **Methods**). Furthermore, the recombination of  
120 Eurasian alleles onto introgressed haplotypes followed by their loss on other backgrounds is also  
121 extremely rare ( $<1\%$  for all scenarios, **Table S2**).

122 RAs occurred at approximately one-half the frequency of NDAs in simulated modern  
123 Eurasians, and the RA:NDA ratio was robust to changes in the admixture fraction used in the  
124 model (**Figure 2A**). Thus, extrapolating from the hundreds of thousands of NDAs that persist in  
125 modern Eurasian genomes, our simulations predict that Neanderthal introgression of alleles that  
126 were lost in the Eurasian OOA bottleneck was common.

127

## 128 **Hundreds of thousands of RAs exist in modern Eurasian populations**

129 To conservatively identify candidate RAs in the genomes of modern Eurasians, we sought variants  
130 in 1000 Genomes Phase 3 Eurasian populations that are present only on introgressed haplotypes  
131 (**Figure S3**, Methods). We began with sets of tag SNPs on introgressed haplotypes previously  
132 identified by  $S^*$  and comparison to Neanderthal genomes in European (EUR), East Asian (EAS),  
133 and South Asian (SAS) populations (12). For each population, we identified candidate RAs by  
134 collecting variants that are in perfect LD ( $r^2=1$ ) with a Neanderthal tag SNP, but that are not tag  
135 SNPs themselves. We then evaluated each of these candidate RAs with regard to its ancestral status  
136 and presence in modern sub-Saharan Africans. Candidate alleles that match the high-confidence  
137 ancestral allele call from 1000 Genomes or that are present at a frequency of  $>1\%$  in sub-Saharan  
138 African populations without substantial Neanderthal ancestry were deemed RAs. We note that this  
139 approach is likely conservative, because many true RAs no longer retain perfect LD with any  
140 NDA.

141 Altogether, we identified 209,176 RAs (**Figure 2B**). The South Asian and East Asian  
142 populations each have more RAs (139,270 and 125,257 respectively) than the European  
143 populations (90,121). These numbers reflect the larger number of Neanderthal tag SNPs  
144 found in the Asian populations (**Figure S3**, **Figure S4**) and are consistent with the greater levels  
145 of Neanderthal ancestry previously observed in East Asians. However, current estimates  
146 suggest that it is only  $\sim 12\text{--}20\%$  greater (29). The observed ratios of RAs to NDAs within each  
147 population (0.46–0.65) were qualitatively consistent with the ratios predicted from the  
148 simulations (**Figure 2B**).

149 A substantial fraction of RAs (EAS: 22%, EUR: 30%, and SAS: 28%) are present in  
150 human populations exclusively in genomic regions of Neanderthal ancestry; i.e. these alleles  
151 are not present in African populations. This suggests that the non-reintroduced allele became  
152 fixed at these positions in AMH populations before the reintroduction of the other ancestral  
153 allele via Neanderthal admixture.

154 Next, we examined the distribution of RAs across introgressed haplotypes: 84.4% (EAS),  
155 81.8% (EUR), and 81.7% (SAS) of introgressed haplotypes contain RAs. The average number  
156 of RAs per introgressed haplotype is  $\sim 17$ . (**Figure S5A**). Of the haplotypes containing RAs,  
157 21.3% (EAS), 11.8% (EUR), and 15.2% (SAS) contain more RAs than NDAs. RAs also have  
158 greater heterogeneity in their distributions across haplotypes, and appear more clustered than  
159 NDAs (**Figure S5B,C**). These results likely underestimate the true number and distribution of  
160 RAs; nonetheless, they demonstrate the existence of RAs and the potential for RAs to  
161 influence the function and evolution of most introgressed haplotypes.

## 162 **RA-containing introgressed haplotypes are associated with anthropometric human traits and** 163 **disease risk**

165 To update knowledge of human phenotypes influenced by Neanderthal introgression, we  
166 intersected all RAs and NDAs from each of the three Eurasian populations with the variants  
167 reported in the GWAS Catalog as of July 23, 2018 (30). Overall, Eurasian RAs tagged 270 unique  
168 associations, 88 of which were genome-wide significant ( $P < 10^{-8}$ ). NDAs tagged 357 unique  
169 associations, 129 of which were genome-wide significant (**File S2**).

170 Patterns of LD prohibit the implication of the RAs, the associated NDAs, or other  
171 variants as causal. However, 68% of NDAs significantly associated with at least one  
172 phenotype are in perfect LD with at least one RA. The consequence of this is that over  
173 70% of the phenotype associations with NDAs have an equally strong association with an

174 RA. Thus, while previous studies have used GWAS to link variants on introgressed haplotypes  
175 with phenotypes (5, 6, 9), many associations could be mediated by RAs. By considering a larger set  
176 of variants in LD with Neanderthal tag SNPs, RAs, and updates to the GWAS catalog, we identify  
177 many additional associations between introgressed alleles and phenotypes in modern populations.

178 Many of the phenotypes directly tagged by RAs are morphometric (e.g., cranial base width,  
179 BMI, and height), and several others relate to more general aspects of outward appearance (e.g.,  
180 chin dimples, male-pattern baldness, and skin pigmentation). Introgressed RAs are also associated  
181 with many pathologies, including cancers (breast, esophageal, lung, prostate), Alzheimer's disease,  
182 and neurological conditions like neuroticism and bipolar disorder (File S2).

183 Several RAs that are no longer present within sub-Saharan African populations have  
184 associations with traits. These RAs are particularly interesting, because they represent loci at which  
185 derived alleles became fixed in modern human populations after the split from ancestors of  
186 Neanderthals. For example, an RA (rs11564258) near *MUC19*, a gel-forming mucin expressed in  
187 epithelial tissues with a potential role in interaction with microbial communities, is strongly  
188 associated with both Crohn's disease and inflammatory bowel disease (31, 32). This locus has  
189 been identified in scans for potential adaptive introgression (18). We also find associations with  
190 facial morphology, body mass index, sleep phenotypes, and metabolite levels in smokers (33-37).

#### 191 192 **RAs and NDAs have different fitness effects**

193 RAs and NDAs reflect different evolutionary histories. NDAs arose in Neanderthal populations  
194 with small effective population size and only came into the AMH genomic context via admixture  
195 ~50,000 years ago. As a result, there was likely a substantial genetic cost to the introgression of  
196 NDAs into Eurasian populations (19, 20). In contrast, RAs arose in relatively larger ancestral  
197 hominin populations and are more ancient than the NDAs. Thus, we hypothesized that RAs and  
198 NDAs would have different distributions of fitness consequences in modern human populations,  
199 with NDAs more likely to be deleterious than RAs.

200 We first explored the support for this hypothesis with evolutionary simulations. In 100  
201 simulated modern Eurasian populations, NDAs were the most deleterious class of alleles, and RAs  
202 had significantly less extreme effects (median selection coefficient RA=-7.7e-5; NDA=-1.9e-4;  $p \approx$   
203 0, Wilcoxon Rank Sum test, Figure 3A). This result was not sensitive to admixture fraction (Figure  
204 S6). As expected, among all segregating alleles present in simulated Eurasian populations, African  
205 alleles that passed through the Eurasian OOA bottleneck had the least deleterious fitness effects.  
206 Thus, supporting previous studies, Neanderthal admixture likely introduced weakly deleterious  
207 NDAs into admixed populations (19, 20). However, this hybridization simultaneously  
208 reintroduced a host of more ancient RAs that Eurasian ancestors lost during their journey out of  
209 Africa and our simulations suggest these have fitness effects which are intermediate to those of  
210 AMH alleles maintained in Eurasians and NDAs.

211 We then tested these simulated predictions in real genomic data by comparing the predicted  
212 deleteriousness scores of RAs and NDAs. Combined Annotation-Dependent Depletion (CADD)  
213 is a variant annotation tool that integrates variant attributes and effect predictions from other tools,  
214 and then assigns a single score based on a statistical model trained on real and simulated variants  
215 (38). The scaled CADD scores for the RAs were significantly lower (less deleterious) than for  
216 NDAs in each population (median scaled score: NDA=2.67; RA=2.23;  $P \approx 0$ , Wilcoxon Rank  
217 Sum test; Figure 3B, Figure S7). NDAs were nearly twice as prevalent among the most deleterious  
218 of all variants (CADD score > 10).



219 To evaluate the potential effects of RAs and NDAs at the introgressed haplotype level, we  
220 repeated these analyses considering the maximum CADD scores for RAs and NDAs within each  
221 haplotype. Overall, the most deleterious RA in a haplotype is significantly less deleterious than the  
222 most deleterious NDA (median scaled CADD score: NDA=13.34; RA=5.79;  $P \approx 0$ ; **Figure 3C**).  
223 This is the result of both the greater number of NDAs per haplotype and differences in the  
224 CADD score distributions between NDAs and RAs (**Figure 3B**). Given the strong LD between  
225 variants on each introgressed haplotype, it is informative to quantify these distributions at the  
226 haplotype level. Indeed, for over 60% of introgressed haplotypes, the maximum NDA score falls  
227 in the top 10% of the most deleterious variants genome-wide (scaled scores above 10); only 0.23%  
228 of introgressed haplotypes have maximum RA score in this range. Taken together, both simulation  
229 and analyses of observed variants argue that the NDAs are more likely to be deleterious than the  
230 more ancient RAs, especially when viewed within the context of introgressed haplotypes  
231 themselves. Therefore, as expected from their different evolutionary histories, the fitness effects of  
232 RAs are likely different from NDAs.

233 In spite of these differences in estimated fitness effects, RAs and NDAs were similarly  
234 likely to overlap functional gene regulatory elements according to RegulomeDB, a variant  
235 annotation tool that integrates known and predicted regulatory elements (39). In total, 19,882  
236 RAs are predicted to influence gene regulatory elements; this fraction is nearly identical to the  
237 estimate for NDAs (**Figure S9**; 10.0% vs. 10.1%,  $P = 0.07$ ). These results suggest that RAs and  
238 NDAs have similar relevance to gene regulation, and they are not confounded by LD.

239

#### 240 **Some RAs have conserved regulatory associations in European and African populations**

241 Given the high LD between RAs and NDAs, it is challenging to determine from genetic association  
242 data alone whether a particular RA or NDA is functional. To search for RAs that are functional  
243 independent of associated NDAs, we considered cross-population eQTL data from  
244 lymphoblastoid cell lines (LCLs) from European (EUR) and sub-Saharan African Yoruba (YRI)  
245 individuals (40). We tested European RAs for shared eQTL activity in Europeans and Yoruba  
246 (**Figure 4A**). Because sub-Saharan African populations have little to no Neanderthal ancestry, no  
247 alleles in these populations are in LD with NDAs. Thus, if an allele that was reintroduced into  
248 Eurasians shows similar effects on gene expression in both populations, it strongly suggests that that  
249 the RA influences expression, and that introgression reintroduced ancestral regulatory function.

250 In the LCL eQTL data derived from both EUR and YRI individuals, we identified  
251 42 significant cross-population RA eQTLs. These RA eQTLs influence the expression of  
252 nine genes (**Table S3**). The expression differences observed for the RAs in EUR have the  
253 same direction of effect and similar magnitude as those observed for the corresponding  
254 allele in YRI. For example, two genes, *SDSL* and *HDHD5*, each have four cross-  
255 population RA eQTLs that have similar effects on gene expression in both EUR and YRI  
256 (**Figure 4B**). Given the low sample size, limited power, and limited cellular scope of the  
257 cross-population eQTL data, it is challenging to estimate the full extent to which RAs  
258 contribute regulatory function. Nonetheless, these results suggest that many RAs are  
259 functional in Eurasian individuals.

260

#### 261 **RAs can influence expression independent of NDAs**

262 To evaluate if RAs directly influence expression in EUR individuals, we functionally dissected the  
263 regulatory activity of an introgressed haplotype containing cross-population RA eQTLs. *HDHD5*  
264 (also known as *CECR5*) is a hydrolase domain containing protein that is expressed in diverse

265 tissues. It is located in a region of chromosome 22 associated with Cat Eye Syndrome (CES), a rare  
266 disease associated with chromosomal abnormalities in 22q11 with highly variable clinical  
267 presentation that often includes multiple malformations affecting the eyes, ears, anus, heart, and  
268 kidneys (41). The *HDHD5* locus contains an introgressed 2 kb region that carries an NDA that is  
269 in perfect LD with four RAs that are cross-population eQTLs for *HDHD5* (Figure 4C).

270 We performed luciferase reporter assays in LCLs on four different versions of the region that  
271 contains the NDA and RA eQTLs (Figure 4D, Table S5). First, we evaluated the luciferase activity  
272 driven by a reporter construct with the European version of this sequence without introgression  
273 (EUR-EUR). This sequence drove significant expression above baseline ( $\sim 2.0$ x vector with no  
274 insert,  $P < 0.01$ , t-test). We compared this activity to constructs synthesized to carry the RAs with  
275 the associated NDA (NDA-RA), the RAs without the NDA (EUR-RA), and the NDA without the  
276 RAs (NDA-EUR). Both RA-containing sequences drove significantly lower luciferase activity, and  
277 there was no significant difference in the activity of the NDA-RA and the EUR-RA sequences  
278 (Figure 4D). Thus, as predicted by the cross-population eQTL data, the RA locus influences  
279 expression independently of the associated NDA, and the RA-containing sequences have lower  
280 activity than sequences without the RAs.

281 To ascertain whether the conservation of activity patterns we demonstrated at the *HDHD5*  
282 locus could be specifically attributed to one of the four RAs, we analyzed MPRA data from LCLs  
283 (42). The MPRA simultaneously evaluated the regulatory potential of candidate variants in LCL  
284 eQTL to identify causal variants. Only one of the four cross-population RA eQTL (rs71312076)  
285 showed significant regulatory effects (RA:EUR allelic skew=2.122,  $P=6.6e-3$ , FDR=0.034)  
286 compared to the non-reintroduced allele (Figure 4E). These effects were observed on the non-  
287 introgressed European reference background, further demonstrating the ability of this RA locus to  
288 influence regulation independent of NDAs.

289 Together, these results provide three orthogonal lines of evidence (cross-population eQTL,  
290 luciferase reporter, and MPRA) implicating RAs in the reintroduction of regulatory effects in the  
291 *HDHD5* locus. Importantly, both our luciferase assays and the MPRA data show that the  
292 functional contribution of RAs within a European genomic context is not dependent on the  
293 introgressed haplotype in which it occurs. Therefore, these data, along with the eQTL status of this  
294 region in YRI, demonstrate that Neanderthal introgression restored an allele lost in the Eurasian  
295 OOA bottleneck that influences gene regulation.

296

### 297 **RAs are enriched for gene regulatory effects in brain tissues**

298 Introgressed haplotypes have been previously shown to modulate gene regulation, especially in the  
299 brain (24, 43). Given that we have now demonstrated that RAs can reintroduce lost gene regulatory  
300 functions and that RAs and NDAs likely have different distributions of fitness effects, we evaluated  
301 whether RAs were enriched among introgressed eQTL in any of the 48 tissues profiled in v7 of the  
302 Genotype-Tissue Expression (GTEx) project (44). Here we only analyzed European RAs and  
303 NDAs due to the strong European ancestry bias in GTEx.

304 Introgressed eQTL are found in all GTEx tissues, and 18% (16,318) of EUR RAs are  
305 eQTLs in at least one tissue. However, by definition each RA is associated with at least one NDA,  
306 and 16% (31,822) of NDAs are eQTLs in at least one tissue. Therefore, to identify tissues in which  
307 RAs are disproportionately associated with observed regulatory effects, we tested for RA  
308 enrichment among all introgressed eQTLs in each tissue. Accordingly, we calculated an odds ratio  
309 (OR) for each GTEx tissue based on the status of introgressed variants as RAs vs. NDAs and as  
310 eQTLs in that tissue (Methods).

311 Thirteen of the 48 tissues are significantly enriched for RAs among all introgressed  
312 eQTLs ( $P < 0.01$ , hypergeometric test after Bonferroni correction), and four tissues are  
313 significantly depleted of RA eQTL (**Figure 5**). Brain tissues appear enriched among the RA  
314 eQTL enriched tissues (7 of 13,  $P = 0.0144$ , hypergeometric test), though there is likely  
315 shared regulatory architecture among brain regions. In brain, the strongest enrichment of  
316 RA eQTLs is in the frontal cortex, while the greatest overall number occurs in the  
317 cerebellar hemisphere. RA eQTLs are also significantly enriched in the pituitary gland,  
318 pancreas, adrenal gland, testes, and tibial nerve. RAs are significantly depleted in  
319 esophagus, colon, salivary gland, and vagina. These enrichments and depletions reflect the  
320 interplay between eQTL status and LD among the introgressed alleles. Given that all RAs  
321 are in perfect LD with at least one NDA, this suggests that the presence of RAs on an  
322 introgressed haplotype influences the likelihood of regulatory activity in some tissues, and  
323 that there are different pressures on RA-containing introgressed haplotypes in different  
324 tissues.

325

## 326 DISCUSSION

327 Here we demonstrate that thousands of alleles lost in the Eurasian OOA bottleneck had been  
328 retained within Neanderthals, and that the presence of these ancient alleles in modern  
329 Eurasians is exclusively attributable to archaic admixture between Neanderthals and AMHs  
330 (**Figure 1A**). We further show that RAs and NDAs have different fitness effects, and that some  
331 RAs have gene regulatory functions that are not dependent upon associated NDAs.  
332 Nevertheless, in spite of the high prevalence of RAs and their potential to independently  
333 influence function, interpretation of the phenotypic effects of Neanderthal introgression has  
334 generally focused on NDAs. Our results argue that RAs must also be considered in any  
335 analyses of archaic admixture.

336 Our approach identifies more than 200,000 RAs, yet more work is needed to  
337 comprehensively identify all RAs in Eurasians. For example, our conservative approach  
338 misses true RAs that no longer have perfect LD with the original Neanderthal tag SNPs.  
339 Furthermore, thousands of candidate RAs were not classifiable because they lacked a high-  
340 confidence ancestral assignment or were not observed in modern Africans. Some of these  
341 unclassified variants are undoubtedly ancient, but thus far defy confident characterization due  
342 to their complex histories. We expect that more sophisticated simulations and probabilistic  
343 modeling could allow for the identification of additional RAs. For example, modeling full  
344 chromosomes with detailed recombination maps could be used to assign confidence scores to  
345 candidate RAs that are no longer in perfect LD with NDAs. Furthermore, simulations  
346 considering additional fitness parameters, mutation rates, and migration patterns could more  
347 accurately inform our expectations for the number of RAs in introgressed populations and to  
348 evaluate the extent to which RAs could counterbalance the effects of NDAs (45-47).  
349 Nonetheless, our simulations and analyses of real genomes agree that RAs are common.

350 Previous work has implicated the small effective population size of Neanderthal  
351 populations as a key factor in their transmission of weakly deleterious NDAs into AMHs via  
352 introgression (19, 20, 48). Our observations demonstrate that Neanderthal populations  
353 additionally preserved and reintroduced many less deleterious, and perhaps beneficial, ancient  
354 alleles (**Figure 3**, **Figure S8**, **Figure S9**). While NDAs and RAs were both carried by  
355 Neanderthal populations with low effective population size, the lower probability of  
356 deleteriousness among RAs is consistent with many aspects of their evolutionary histories.



357 First, RAs are more ancient than NDAs, and thus selection has had greater opportunity to act on  
358 them. Second, the RAs likely arose in a population with relatively larger effective population size  
359 (*1, 4*). Finally, the RAs arose in a genomic background ancestral to and likely more similar to  
360 AMHs.

361 Comprehensive estimation of the total number of functional RAs is challenging due to LD  
362 with NDAs and the lack of comparative functional data from diverse cellular contexts and  
363 populations. Nonetheless, analysis of known regulatory elements suggests that ~10% (19,882) of  
364 RAs are likely to influence transcription factor binding or gene expression (**Figure S9**). As MPRA,  
365 eQTL analyses, and GWAS are performed in more diverse populations and tissues it will be  
366 possible to identify functional RAs on a much broader scale.

367 Given our demonstration that some RAs restore functions lost in Eurasian populations, the  
368 enrichment for RAs relative to NDAs among GTEx eQTLs in many tissues—the brain in  
369 particular—is provocative (**Figure 5**). Brain tissues have enrichment for Neanderthal eQTL (*24*),  
370 and there is significant allele-specific down regulation of haplotypes carrying Neanderthal alleles in  
371 the brain and testes (*43*). Furthermore, these observations are consistent with previous results  
372 about the gene regulatory effects of introgressed alleles, and several evolutionary scenarios may be  
373 involved. First, the depletion of NDAs relative to RAs on some introgressed haplotypes with gene  
374 regulatory functions could be a result of previously demonstrated selection against NDAs in some  
375 tissues (*43*). This selection would deplete tissue specific regulatory regions of NDA-rich  
376 introgressed haplotypes; indeed, the two tissues with known allele-specific down regulation of  
377 Neanderthal alleles, brain and testes, are enriched for RAs compared to NDAs. Second, the  
378 patterns we see could result from positive or balancing selection acting to retain beneficial RAs.  
379 Under this scenario, archaic admixture restored alleles with beneficial regulatory functions that  
380 were lost during the Eurasian OOA bottleneck, and these RAs contributed to the maintenance of  
381 some introgressed haplotypes. The third possibility is that both RAs and NDAs on introgressed  
382 haplotypes are functional and influence selective pressures on the haplotypes. In this case, the  
383 presence of RAs could counterbalance mildly deleterious effects of associated NDAs, and thus  
384 buffer some introgressed haplotypes from purifying selection. Importantly, these explanations are  
385 not mutually exclusive, and the reality is likely some combination of all of them.

386 Overall, we anticipate that the regulatory effects of RAs and NDAs differ between tissues  
387 based on the genetic diversity of and strength of constraint on their regulatory landscapes.  
388 Interestingly, nervous system tissues (including the brain) and the testes have extreme levels of  
389 selection on gene expression (high and low, respectively) (*49*). Given the range of RA eQTL  
390 enrichments across GTEx tissues, including tissues without evidence of selection against  
391 Neanderthal alleles, we propose that the presence of RAs and NDAs is the result of a mixture of  
392 selective pressures acting within the regulatory constraints of each tissue.

393 Therefore, whether contributing beneficial effects on their own or serving to mitigate the  
394 deleterious effects of NDAs, RAs likely play a functional role across diverse tissues and thus  
395 contribute to the persistence of introgressed haplotypes. Disentangling the effects of introgressed  
396 eQTLs in high LD will require further experimental evidence along the lines of those we  
397 performed at the *HDDH5* locus (**Figure 4D**). In addition, it would be informative to compare the  
398 functional effects of RAs with other alleles restored to Eurasian populations by recent direct  
399 migration from Africa (*22, 50*), as well as effects within African populations.

400 Analysis of RAs is also relevant to studies of the genetics of ancient hominin populations.  
401 For example, tens of thousands of RAs that are present in Eurasians have since been lost in  
402 African populations. These ancient variants could both inform ongoing debates over differences in

403 efficiency of natural selection between Africa and Eurasia (51–54), as well as provide a  
404 window into ancient genetic variation that was present in Africa over a half million years  
405 ago.

406

407

## 408 **CONCLUSIONS**

409 Here we show that Neanderthal introgression reintroduced functional alleles lost in the Eurasian  
410 out of Africa bottleneck. This illustrates the importance of accounting for shared ancestral variation  
411 among hominin populations and shows that hybridization events between populations have the  
412 potential to modulate the effects bottlenecks have on allelic diversity. Our findings open several  
413 avenues for future work on quantifying the evolutionary and functional dynamics of archaic  
414 introgression. Previous analyses of introgression have focused on alleles derived within the  
415 Neanderthal lineage. Reintroduced alleles must also be considered in analyses of Neanderthal  
416 introgression, at both the haplotype and genome scale. Future studies should account for the  
417 potentially beneficial fitness effects of these alleles and their influence on the maintenance of  
418 Neanderthal ancestry.

419

## 420 ACKNOWLEDGMENTS

421 We thank Ben Haller, Phillip Messer, and Kelley Harris for advice on evolutionary simulations.  
422 We thank Ryan Tewhey for discussions of MPRA results. This work was supported by the  
423 National Institutes of Health: T32EY021453 to CNS; T32GM080178 to DS; K22CA184308 to  
424 EH; and R01GM115836 and R35GM127087 to JAC. This work was conducted in part using the  
425 resources of the Advanced Computing Center for Research and Education at Vanderbilt  
426 University, Nashville, TN.

## 427 AUTHOR CONTRIBUTIONS

429 DCR, CNS, EM and JAC conceived and conducted the computational analyses. DS and EH  
430 performed the luciferase assays. DCR and JAC wrote the manuscript with input from all authors.

## 431 DECLARATION OF INTERESTS

433 The authors declare no competing interests.

## 434 REFERENCES

- 437 1. The 1000 Genomes Project Consortium, A global reference for human genetic variation.  
438 *Nature*. **526**, 68–74 (2015).
- 439 2. S. Mallick *et al.*, The Simons genome diversity project: 300 genomes from 142 diverse  
440 populations. *Nature*. **538**, 201 (2016).
- 441 3. L. Pagani *et al.*, Genomic analyses inform on migration events during the peopling of  
442 Eurasia. *Nature*. **538**, 238–242 (2016).
- 443 4. B. M. Henn, L. R. Botigué, C. D. Bustamante, A. G. Clark, S. Gravel, Estimating Mutation  
444 Load in Human Genomes. *Nat. Rev. Genet.* **16**, 333–343 (2015).
- 445 5. K. Prüfer *et al.*, The complete genome sequence of a Neanderthal from the Altai  
446 Mountains. *Nature*. **505**, 43–49 (2014).
- 447 6. K. Prüfer *et al.*, A high-coverage Neandertal genome from Vindija Cave in Croatia. *Science*  
448 *(80- )*. **358**, 655–658 (2017).
- 449 7. M. Meyer *et al.*, A high-coverage genome sequence from an archaic Denisovan individual.  
450 *Science (80- )*. **338**, 222–226 (2012).
- 451 8. R. E. Green *et al.*, A draft sequence of the neandertal genome. *Science (80- )*. **328**, 710–  
452 722 (2010).
- 453 9. S. Sankararaman *et al.*, The genomic landscape of Neanderthal ancestry in present-day  
454 humans. *Nature*. **507**, 354–357 (2014).
- 455 10. B. Vernot, J. M. Akey, *Science (80- )*, in press.
- 456 11. S. Sankararaman, S. Mallick, N. Patterson, D. Reich, The Combined Landscape of  
457 Denisovan and Neanderthal Ancestry in Present-Day Humans. *Curr. Biol.* **26**, 1241–1247  
458 (2016).
- 459 12. B. Vernot *et al.*, Excavating Neandertal and Denisovan DNA from the genomes of  
460 Melanesian individuals. *Science (80- )*. **352**, 235–239 (2016).
- 461 13. L. Abi-Rached *et al.*, The Shaping of Modern Human Immune Systems by Multiregional  
462 Admixture with Archaic Humans. *Science (80- )*. **334**, 89–94 (2011).
- 463 14. F. L. Mendez, J. C. Watkins, M. F. Hammer, A Haplotype at STAT2 Introgressed from  
464 Neanderthals and Serves as a Candidate of Positive Selection in Papua New Guinea. *Am. J.*

- 465 *Hum. Genet.* **91**, 265–274 (2012).
- 466 15. M. Dannemann, K. Prüfer, J. Kelso, Functional implications of Neandertal introgression in  
467 modern humans. *Genome Biol.* **18**, 61 (2017).
- 468 16. X. Liu, X. Jian, E. Boerwinkle, dbNSFP: a lightweight database of human nonsynonymous  
469 SNPs and their functional predictions. *Hum. Mutat.* **32**, 894–9 (2011).
- 470 17. F. Racimo, S. Sankararaman, R. Nielsen, E. Huerta-Sánchez, Evidence for archaic adaptive  
471 introgression in humans. *Nat. Rev. Genet.* **16**, 359–371 (2015).
- 472 18. F. Racimo, D. Marnetto, E. Huerta-Sánchez, Signatures of archaic adaptive introgression in  
473 present-day human populations. *Mol. Biol. Evol.* (2017), doi:10.1093/molbev/msw216.
- 474 19. I. Juric, S. Aeschbacher, G. Coop, The Strength of Selection against Neanderthal  
475 Introgression. *PLOS Genet.* **12**, e1006340 (2016).
- 476 20. K. Harris, R. Nielsen, The Genetic Cost of Neanderthal Introgression. *Genetics* (2016).
- 477 21. R. M. Gitterman *et al.*, Archaic Hominin Admixture Facilitated Adaptation to Out-of-Africa  
478 Environments. *Curr. Biol.* **26**, 3375–3382 (2016).
- 479 22. M. Petr, S. Pääbo, J. Kelso, B. Vernot, The limits of long-term selection against Neandertal  
480 introgression. *bioRxiv* (2018), doi:10.1101/362566.
- 481 23. M. Dannemann, J. Kelso, The Contribution of Neanderthals to Phenotypic Variation in  
482 Modern Humans. *Am. J. Hum. Genet.* **101**, 578–589 (2017).
- 483 24. C. N. Simonti *et al.*, The phenotypic legacy of admixture between modern humans and  
484 Neandertals. *Science (80-. ).* **351**, 737–741 (2016).
- 485 25. Y. Nédélec *et al.*, Genetic Ancestry and Natural Selection Drive Population Differences in  
486 Immune Responses to Pathogens. *Cell* (2016), doi:10.1016/j.cell.2016.09.025.
- 487 26. H. Quach *et al.*, Genetic Adaptation and Neandertal Admixture Shaped the Immune  
488 System of Human Populations. *Cell* (2016), doi:10.1016/j.cell.2016.09.024.
- 489 27. A. J. Sams *et al.*, Adaptively introgressed Neandertal haplotype at the OAS locus  
490 functionally impacts innate immune responses in humans. *Genome Biol.* **17**, 246 (2016).
- 491 28. Y. Hu, Q. Ding, Y. He, S. Xu, L. Jin, Reintroduction of a Homocysteine Level-Associated  
492 Allele into East Asians by Neandertal Introgression. *Mol. Biol. Evol.* **32**, msv176 (2015).
- 493 29. F. A. Villanea, J. G. Schraiber, Multiple episodes of interbreeding between Neandertal and  
494 modern humans. *Nat. Ecol. Evol.* **3**, 39–44 (2019).
- 495 30. J. MacArthur *et al.*, The new NHGRI-EBI Catalog of published genome-wide association  
496 studies (GWAS Catalog). *Nucleic Acids Res.* **45**, D896–D901 (2017).
- 497 31. A. Franke *et al.*, Genome-wide meta-analysis increases to 71 the number of confirmed  
498 Crohn’s disease susceptibility loci. *Nat. Genet.* **42**, 1118–25 (2010).
- 499 32. L. Jostins *et al.*, Host-microbe interactions have shaped the genetic architecture of  
500 inflammatory bowel disease. *Nature.* **491**, 119–24 (2012).
- 501 33. M. K. Lee *et al.*, Genome-wide association study of facial morphology reveals novel  
502 associations with *FREM1* and *PARK2*. *PLoS One.* **12**, e0176566 (2017).
- 503 34. S. L. Park *et al.*, Mercapturic Acids Derived from the Toxicants Acrolein and  
504 Crotonaldehyde in the Urine of Cigarette Smokers from Five Ethnic Groups with Differing  
505 Risks for Lung Cancer. *PLoS One.* **10**, e0124841 (2015).
- 506 35. J. Spada *et al.*, Genome-wide association analysis of actigraphic sleep phenotypes in the  
507 LIFE Adult Study. *J. Sleep Res.* **25**, 690–701 (2016).
- 508 36. A. M. Kulminski *et al.*, Strong impact of natural-selection-free heterogeneity in genetics of  
509 age-related phenotypes. *Aging (Albany. NY).* **10**, 492–514 (2018).
- 510 37. S. M. Lutz *et al.*, A genome-wide association study identifies risk loci for spirometric  
511 measures among smokers of European and African ancestry. *BMC Genet.* **16**, 138 (2015).

- 512 38. M. Kircher *et al.*, A general framework for estimating the relative pathogenicity of human  
513 genetic variants. *Nat. Genet.* **46**, 310–315 (2014).
- 514 39. A. P. Boyle *et al.*, Annotation of functional variation in personal genomes using  
515 RegulomeDB. *Genome Res.* **22**, 1790–7 (2012).
- 516 40. T. Lappalainen *et al.*, Transcriptome and genome sequencing uncovers functional variation  
517 in humans. *Nature.* **501**, 506–11 (2013).
- 518 41. OMIM, CAT EYE SYNDROME; CES, (available at <https://www.omim.org/entry/115470>).
- 519 42. R. Tewhey *et al.*, Direct Identification of Hundreds of Expression-Modulating Variants  
520 using a Multiplexed Reporter Assay. *Cell.* **165**, 1519–1529 (2016).
- 521 43. R. C. McCoy, J. Wakefield, J. M. Akey, Impacts of Neanderthal-Introgressed Sequences on  
522 the Landscape of Human Gene Expression. *Cell.* **168**, 916–927.e12 (2017).
- 523 44. GTEx Consortium, Genetic effects on gene expression across human tissues. *Nature.* **550**,  
524 204–213 (2017).
- 525 45. P. Moorjani, C. E. G. Amorim, P. F. Arndt, M. Przeworski, Variation in the molecular  
526 clock of primates. *Proc. Natl. Acad. Sci.* **113**, 10607–10612 (2016).
- 527 46. A. Harpak, A. Bhaskar, J. K. Pritchard, Mutation Rate Variation is a Primary Determinant  
528 of the Distribution of Allele Frequencies in Humans. *PLOS Genet.* **12**, 1–22 (2016).
- 529 47. K. Harris, J. K. Pritchard, Rapid evolution of the human mutation spectrum. *Elife.* **6**,  
530 e24284 (2017).
- 531 48. S. Castellano *et al.*, Patterns of coding variation in the complete exomes of three  
532 Neandertals. *Proc. Natl. Acad. Sci.* **111**, 6666–6671 (2014).
- 533 49. D. Brawand *et al.*, The evolution of gene expression levels in mammalian organs. *Nature.*  
534 **478**, 343–348 (2011).
- 535 50. A. Platt, J. Hey, Recent African gene flow responsible for excess of old rare genetic variation  
536 in Great Britain. *bioRxiv* (2017), doi:10.1101/190066.
- 537 51. B. M. Henn *et al.*, Distance from sub-Saharan Africa predicts mutational load in diverse  
538 human genomes. *Proc. Natl. Acad. Sci. U. S. A.* **113**, E440-9 (2016).
- 539 52. K. E. Lohmueller, The distribution of deleterious genetic variation in human populations.  
540 *Curr. Opin. Genet. Dev.* **29**, 139–146 (2014).
- 541 53. K. E. Lohmueller *et al.*, Proportionally more deleterious genetic variation in European than  
542 in African populations. *Nature.* **451**, 994–997 (2008).
- 543 54. Y. B. Simons, M. C. Turchin, J. K. Pritchard, G. Sella, The deleterious mutation load is  
544 insensitive to recent population history. *Nat. Genet.* **46**, 220–4 (2014).
- 545 55. B. C. Haller, P. W. Messer, SLiM 2: Flexible, interactive forward genetic simulations. *Mol.*  
546 *Biol. Evol.* (2017), doi:10.1093/molbev/msw211.
- 547 56. A. Eyre-Walker, M. Woolfit, T. Phelps, The Distribution of Fitness Effects of New  
548 Deleterious Amino Acid Mutations in Humans. *Genetics.* **173**, 891–900 (2006).
- 549 57. S. Gravel *et al.*, Demographic history and rare allele sharing among human populations.  
550 *Proc. Natl. Acad. Sci.* **108**, 11983–11988 (2011).
- 551 58. P. Danecek *et al.*, The variant call format and VCFtools. *Bioinformatics.* **27**, 2156–2158  
552 (2011).
- 553
- 554
- 555



## 556 **FIGURE CAPTIONS**

557  
558 **Figure 1. Schematic of the reintroduction of alleles lost in the Eurasian out of Africa (OOA)**  
559 **bottleneck by Neanderthal introgression.** (A) Illustration of the evolutionary trajectory and  
560 resulting genomic signature of an allele A (blue) that was: (1) segregating in the ancestors of  
561 modern humans and Neanderthals, (2) lost to the ancestors of Eurasians in the human OOA  
562 bottleneck, and (3) reintroduced to Eurasians through Neanderthal admixture. Consequently,  
563 reintroduced alleles (RAs) are expected to be in high linkage disequilibrium with some  
564 Neanderthal-derived alleles (NDAs; orange) in introgressed haplotypes (gray) in modern  
565 Eurasians. (B) Schematics of the different evolutionary histories of interest in this paper. All alleles  
566 lost in the Eurasian OOA bottleneck and reintroduced by Neanderthal introgression are referred  
567 to as RAs. Alleles that appeared in the Neanderthal lineage, were not present in the ancestors of  
568 humans and Neanderthals, and only exist on introgressed haplotypes in modern humans are  
569 referred to as Neanderthal-derived alleles (NDAs).

570  
571 **Figure 2. Neanderthal introgression reintroduced thousands of alleles lost in the OOA bottleneck**  
572 **to Eurasian populations.** (A) The ratios of RAs to NDAs over 100 simulated Eurasian populations.  
573 The simulations predict approximately one RA for every two NDAs, and these estimates are  
574 robust to changes in the simulated Neanderthal admixture fraction. Misclassification of non-RAs as  
575 RAs due to independent, convergent mutations is extremely rare (**Figure S2**) and the overall false  
576 discovery rate for LD-based RA identification is below  $\sim 1\%$  (**Table S2**). (B) The number of RAs  
577 and NDAs in each Eurasian 1000 Genomes population (EAS = East Asian; EUR = European  
578 ancestry; SAS = South Asian) identified by our pipeline (**Figure S3**; Methods). Neanderthal  
579 admixture reintroduced over 200,000 alleles lost in the human OOA bottleneck into the ancestors  
580 of 1000 Genomes populations, and the observed RA-to-NDAs ratio is consistent with the  
581 simulations.

582  
583 **Figure 3. Reintroduced alleles have different fitness effects than Neanderthal-derived alleles.** (A)  
584 Simulations identify weak selection against both NDAs and RAs, but the RAs persisting in modern  
585 Eurasian populations were consistently less deleterious than NDAs over 200 simulations (median  
586 selection coefficient RA=7.7e-5; NDA=1.9e-4,  $P \approx 0$ , Wilcoxon rank sum test). (B) In modern  
587 Eurasian populations, RAs are predicted to be significantly less deleterious than NDAs by CADD  
588 (median scaled CADD: NDA=2.7; RA=2.1;  $P \approx 0$ ). The upper tail of highly deleterious mutations  
589 is highlighted in the inset. Results are similar for unscaled scores. (C) At the haplotype level, the  
590 maximum RA CADD score per haplotype is significantly lower than for NDAs (median scaled  
591 max CADD: NDA=13.3; RA=5.8;  $P \approx 0$ ). This is in part due to the overall difference  
592 demonstrated in (B) and to the greater number of NDAs per haplotype. RAs are rarely the most  
593 deleterious variant per haplotype. Results shown are for Europeans (EUR); results in East and  
594 South Asian populations are similar (**Figure S7**, **Figure S8**).

595  
596 **Figure 4. Reintroduced alleles restore regulatory functions lost in the Eurasian OOA bottleneck.**  
597 (A) Conceptual model of restored regulatory function resulting from Neanderthal admixture.  
598 Here, allele A is a cis-acting regulatory variant that is exclusively found on introgressed haplotypes

599 (gray) in modern Europeans (EUR). Allele A is also present in sub-Saharan Yoruba individuals  
600 (YRI) lacking Neanderthal ancestry. It displays similar cis-regulatory activity in both populations.  
601 This pattern suggests that allele A is an RA in Eurasians and that it influences gene regulation  
602 independent of the associated NDAs. (B) Two examples of genes (*SDSL* and *HDHD5*) with  
603 consistent expression differences (measured in RPKM) associated with RA eQTLs in EUR and  
604 the corresponding allele in YRI LCLs. The RAs are present only on introgressed haplotypes in  
605 EUR, and the NDAs associated with the RAs are not present in YRI. This suggests that these RAs  
606 restore lost gene regulatory functions in Europeans. (C) Schematic of the *HDHD5* locus  
607 highlighting the locations of one NDA (orange) and four RA eQTLs (blue) in the introgressed  
608 haplotype and the different combinations of these alleles present in EUR, YRI, and Neanderthals.  
609 (D) Luciferase activity driven by constructs carrying different combinations of alleles present in the  
610 *HDHD5* locus. We assayed four constructs containing: 1) no introgressed alleles, 2) only the  
611 NDA, 3) only the RAs, and 4) all introgressed variants. Results are summarized over three  
612 replicates. As expected from the eQTL data, constructs lacking RAs drive significantly stronger  
613 expression (~2x baseline) than constructs containing RAs (~1x baseline; two-tailed t-test,  $P < 0.01$   
614 (\*\*)) and  $P < 0.001$  (\*\*\*)). The regulatory effect of the RAs is independent of the presence the  
615 NDA found in introgressed EUR haplotypes. (E) Regulatory activity in a massively parallel  
616 reporter assay (MPRA) for the four *HDHD5* RA eQTLs reveals that rs71312076 has significant  
617 regulatory effects when placed in the non-introgressed European background sequence. The other  
618 three RAs did not drive significant regulatory activity.

619  
620 **Figure 5. Reintroduced alleles are significantly enriched among introgressed eQTLs in brain and**  
621 **several other tissues.** Bubble plot quantifying the enrichment for eQTL activity among EUR RAs  
622 compared to all introgressed eQTL in each GTEx v7 tissue. Enrichment was quantified with an  
623 odds ratio for each tissue based on the status of introgressed variants as RAs vs. NDAs and as  
624 eQTLs. The bubbles are scaled by the number of RA eQTLs in each tissue and colored by the  
625 overall number of introgressed eQTLs. Of the 48 tissues considered, RAs were significantly  
626 enriched compared to NDA eQTLs in 13 tissues, and significantly depleted in four ( $P < 0.01$ ,  
627 hypergeometric test after Bonferroni correction). The strongest enrichment for RA eQTLs was in  
628 the frontal cortex. Brain regions were enriched among the 13 tissues with RA eQTL enrichment (7  
629 of 13,  $P = 0.0144$ , hypergeometric test), though we note that some brain regions likely have shared  
630 regulatory architecture.

## 631 **METHODS**

### 632 **Sequence data**

633 Genomic variants were taken from 1000 Genomes Phase 3v5a data (1). Introgressed Neanderthal  
634 tag SNPs were downloaded from: <http://akevlab.princeton.edu/downloads.html> (12). All analyses  
635 were conducted using GRCh37/hg19 genomic coordinates.

636

### 637 **Evolutionary simulation design**

638 SLiM (v2.6) was used for all evolutionary simulations (55). We used a genomic model taken from  
639 previous simulation studies of Neanderthal introgression and mutation load (20). In brief, the  
640 human genome is represented by a syntenic, locus-based model constructed considering all exons  
641 within the hg19 reference genome. Nucleotide positions of exons are modeled individually while  
642 intergenic regions and chromosomal boundaries are modeled as single sites. Recombination is  
643 modeled as a probability of  $1.0 \times 10^{-8}$  crossovers per site per generation, with probabilities in  
644 intergenic regions scaled by their respective sizes; chromosome boundaries are modeled as having  
645 a recombination rate of 0.5. Mutations are modeled based upon a non-synonymous substitution  
646 rate of  $7.0 \times 10^{-9}$  mutations per site per generation. Fitness effects (FE) were assigned to mutations  
647 based either upon a presumption of neutrality (FE=0) or purifying selection (FE drawn from  
648 gamma distribution with shape parameter 0.23 and mean selection coefficient  $-0.043$ ) (56).

649 The general demographic model through which these genomes were then allowed  
650 to evolve is illustrated in **Figure S1**. Here, genetic diversity within the ancient human  
651 population (10,000 diploid individuals) was first established by allowing mutations to arise  
652 and equilibrate during a “burn in” period of 44,000 generations in the ancestral hominin  
653 population prior to subsequent migrations. To track allelic loss and reintroduction, we  
654 focused on segregating sites that were present in this simulated ancestral population  
655 immediately before the split between the human and Neanderthal lineages; we tracked all  
656 of these ancestral hominin alleles over the 18,000 subsequent generations that  
657 encompassed both the Neanderthal and Eurasian OOA bottlenecks.

658 Then the ancestral Neanderthal population was subsampled to 1,000 individuals  
659 and both human (African) and Neanderthal populations were allowed to evolve separately  
660 for 16,000 generations (400,000-464,000 years assuming a generation time of 25-29 years).  
661 The Eurasian OOA migration and Neanderthal admixture were then modeled as a  
662 simultaneous, discreet event that resulted in an admixed Eurasian population size of 1861  
663 individuals (20, 57). The admixed Eurasian population was then allowed to evolve for  
664 2000 generations before it underwent an exponential growth phase leading to modern  
665 Eurasians. This final Eurasian population is used to evaluate the presence and properties of  
666 RAs.

667 These simulations were run in parallel. One hundred replicates under both neutral  
668 or purifying selection were conducted to establish an estimate of confounding mutations  
669 (**Figure S2**). Eurasian-Neanderthal admixture fractions of both 0.02 and 0.04 were run  
670 under the purifying model, with 100 modern Eurasian populations of 20,310 individuals  
671 each generated for each admixture fraction.

672

### 673 **Quantitating false positives within simulation data**

674 SLiM profiles for all populations were collected at relevant timepoints: t1) Neanderthal OOA, t2)  
675 immediately prior to the Eurasian migration, t3) immediately following admixture, and t4) modern

676 human populations. Mutation origin was used to establish when and where (in the genome) a  
677 variant arose, and successive timepoints were used to query these mutation IDs for  
678 presence/absence.

679 First, we estimated the rate at which variants could be mis-assigned RA status as the result  
680 of independent, convergent origins in African and Neanderthal populations. To infer the  
681 frequency of such confounding variants, all variants in simulated human and Neanderthal  
682 populations were compared immediately prior to admixture ( $t_2$ ) in each of the 100 replicates for  
683 each model. Confounding variants were identified based upon a shared genomic location between  
684 existing variants in Africans and variants that arose within the Neanderthal lineage. These counts  
685 were then contrasted with the number of non-Neanderthal derived mutations and found to be very  
686 rare (**Figure S2**). Moreover, because SLiM does not consider nucleotide state and allows for  
687 “stacked” mutations (i.e., mutations at the same locus), our estimates of false assignment of RA  
688 status in this model are conservative because we also considered nucleotide state in the real data.

689 Second, we evaluated the reliability of requiring perfect LD between RAs and NDAs in  
690 modern Eurasian populations in the inference of RA status. It is possible that non-Neanderthal  
691 alleles could have recombined on to introgressed haplotypes and subsequently been lost outside of  
692 the introgressed context. We reasoned that this scenario would be very unlikely, but to test this we  
693 examined each of the simulated Eurasians ( $t_4$ ) and extracted all variants in perfect LD with an  
694 NDA in modern Eurasians. We then queried the simulation data from  $t_2$  to count how many of  
695 these candidate RA variants were not present on a Neanderthal haplotype. These variants in  
696 perfect LD with an NDA in modern Eurasians that were not present in Neanderthals (and that had  
697 not independently evolved within Eurasians) would be incorrectly inferred to be RAs by our  
698 approach. Fortunately, these events were very rare (1% of RAs or fewer) for each admixture  
699 fraction (**Table S2**). Furthermore, these false discovery rates are likely overestimates since in the  
700 real data, RAs most frequently appear within introgressed haplotypes, with linked NDAs present  
701 on both sides. This would require confounding recombination events to occur twice, with all the  
702 confounding alleles then being subsequently lost on all, non-introgressed haplotypes to maintain  
703 perfect LD. In the future, we anticipate that these simulations can be refined to confidently identify  
704 more RAs that have less than perfect LD with NDAs.

705

### 706 **Estimating RA presence and selection coefficients in modern Eurasians from simulation data**

707 To quantify the frequency of RAs in modern Eurasian populations we first defined “ancestral  
708 hominin variants” as those alleles segregating in the simulated population immediately prior to the  
709 Neanderthal split  $\sim 500,000$  years ago ( $t_2$ ). In the SLiM simulations, we tracked these segregating  
710 ancestral variants through the Neanderthal lineage and into the modern Eurasian population. We  
711 used SLiM’s mutation identifiers to track these ancestral variants through Neanderthals and into  
712 modern Eurasians over the course of 100 replicates for each of two admixture fractions (0.02 and  
713 0.04). From these 200 introgressed Eurasian populations data we were able to identify all the  
714 ancestral variants that passed into AMHs exclusively through 1) the Eurasian OOA migration or 2)  
715 archaic admixture with Neanderthals. Only variants in the second category were considered to be  
716 RAs within the context of the simulation. We extracted allele counts and selection coefficients  
717 (admixture models were run only under purifying selection) for these RA variants from the SLiM  
718 output. We then did the same for the simulated NDAs, the only other class of variants that entered  
719 the modern Eurasian populations exclusively through Neanderthal introgression. These data are  
720 summarized and contrasted in **Figure 2A** and **Figure 3A**.

721

### 722 **RA candidate identification and classification from 1000 Genomes data**

723 To generate a set of candidate RAs, we gathered Neanderthal “tag SNPs” identified in each of the  
724 three, 1000 Genomes Eurasian super-populations (EUR, EAS, SAS;  
725 <http://akeylab.princeton.edu/downloads.html>). We then calculated LD using vcfTools (58) for all  
726 variants in +/-500 kb windows around each variant across individuals from these super-populations  
727 in Phase 3 of the 1000 Genomes project. We extracted all variants that were in perfect LD ( $r^2=1$ )  
728 with any Neanderthal tag SNP in any of EUR, EAS, or SAS.

729 For each candidate RA (i.e., variant in perfect LD with a Neanderthal tag SNP), we:  
730 1) extracted the ancestral allele call from 1000 Genomes, 2) ascertained whether the  
731 designated REF or the ALT allele was the introgressed variant (i.e., in LD with the  
732 Neanderthal tag SNP), 3) calculated the introgressed allele frequency, 4) calculated the  
733 allele frequency for the introgressed allele in sub-Saharan African 1000 Genomes  
734 populations (ESN, GWD, LWK, MSL, YRI), and 5) extracted the Altai Neanderthal  
735 genotype. We then called RA status based on this information (Figure S3). For each RA  
736 candidate, if the introgressed variant matches the high-confidence, ancestral state, it is  
737 classified as an RA, more specifically a reintroduced ancestral allele (RAA). Candidate RAs  
738 that do not match or have a high confidence ancestral allele call are evaluated for presence  
739 in both the Altai Neanderthal and in sub-Saharan Africans (allele frequency > 1%). If the  
740 variant is only present in the Altai Neanderthal, it is classified as an NDA. If the candidate  
741 variant is only present in sub-Saharan African at a frequency > 1%, it is classified as an RA  
742 and assigned to the sub-class of reintroduced hominin alleles (RHA), given that its origin  
743 likely predates the Neanderthal split but its state in the human-chimp ancestor is not  
744 known. If the candidate RA is present in both the Altai Neanderthal and sub-Saharan  
745 Africans, it is classified as an RA (also of the sub-class RHA). For nearly all analyses, RHAs  
746 and RAAs are treated as a single RA class. The results of this classification are summarized  
747 in Figure 2B and supplied in full in File S1. The pipeline and filtering steps are  
748 summarized in Figure S5.

749 We did not constrain our search for RAs to the bounds of previously identified  
750 introgressed haplotypes. While approximately 90% of RAs are within the boundaries of  
751 previously characterized introgressed haplotypes, over half of the haplotypes in each  
752 population have at least one associated RA beyond their previous bounds. In total,  
753 extending all introgressed haplotypes to accommodate all associated RAs increases  
754 introgression estimates by 40.0, 42.6, and 51.9 megabases (Mb) in the EUR, EAS, and SAS  
755 populations, respectively. This represents an increase of ~1.5% in the amount of  
756 introgressed sequence present in each Eurasian population.

757

### 758 **Spatial characterization of RAs and NDAs along introgressed haplotypes**

759 The locations and distributions of RAs within introgressed haplotypes appeared more independent  
760 of haplotype length and more clustered than the distribution of NDAs. The number of NDAs per  
761 haplotype is strongly positively correlated with the length of the haplotype ( $r^2 = 0.85$ ; Figure S5),  
762 but the RA content of a haplotype is more variable ( $r^2 = 0.56$ ). Therefore, while the overall  
763 RA:NDA ratio is ~1:2 over all haplotypes (Figure 2), the RA content of any specific introgressed  
764 haplotype cannot be reliably inferred from the number of NDAs present.

765 To evaluate whether RAs are more clustered on introgressed haplotypes than NDAs, we  
766 summarized the distribution of both NDAs and RAs across all RA-containing haplotypes. We  
767 first divided each RA-containing haplotype into 100 equal-size bins and counted the number  
768 of RAs in each bin. For each haplotype, the bins were then ranked from high to low in terms  
769 of RA count, and the RA contents of each corresponding percentile bin were summed over all



770 the haplotypes. This percentile sum was then divided by the total number of all RAs present over  
771 all the haplotypes to obtain per-bin densities. By calculating per-bin densities only at the end, we  
772 mitigate the potentially confounding effect of some haplotypes containing fewer variants than  
773 others. The result is a summary of the total fraction of RAs found within increasing density  
774 percentiles across all haplotypes. We then did the same for NDAs (**Figure S5**) Overall, a larger  
775 fraction of RAs is found in the densest bins compared to NDAs. For example, in EUR, 55% of  
776 RAs are in the four densest bins, while only 26% of NDAs are in the four densest bins. These  
777 results held across each population and were maintained when down sampling to a set of  
778 haplotypes with matched NDA and RA counts. Thus, when RAs are present, they often occur in  
779 more discrete clusters along introgressed haplotypes than do NDAs. However, we note that the  
780 incomplete ascertainment of RAs and the LD thresholds used to link NDAs may contribute to  
781 these patterns.

782

### 783 **Computational variant effect estimation**

784 To assess the potential functional impact of RAs, we retrieved precomputed Combined  
785 Annotation-Dependent Depletion (CADD) v1.3 scores (<https://cadd.gs.washington.edu/download>)  
786 for all RA and NDA variants. CADD scores are available in two forms: raw and scaled. Raw  
787 CADD scores are the output of the model for each variant, whereas scaled scores are PHRED-  
788 scaled to the range of values observed over all genomic variants (38). Therefore, the scaled scores  
789 communicate how deleterious the effect of a given variant is with respect to the effects seen in all  
790 other variants (e.g., a scaled CADD of 20 means that that a variant is within the top 1% of variants  
791 as ranked by their predicted deleteriousness). Thus, we focused on the PHRED-scaled scores. We  
792 highlight in **Figure 2B** scaled CADD scores at the upper range (e.g., above 10 or 15) that are likely  
793 suggestive of acute pathogenicity. We also compared functional annotation classes downloaded for  
794 RAs and NDAs from RegulomeDB v1.1 (<http://www.regulomedb.org/>).

795

### 796 **Functional annotation of RAs**

797 *Protein coding.* To assess potential functional consequences of RAs in Eurasians, we first explored  
798 effects of RAs on protein coding regions. We intersected all NDAs and RAs from each Eurasian  
799 population with all coding variants annotated in dbSNP (v150). We then filtered for frameshift,  
800 missense, and nonsense variants and constructed a set of non-synonymous, introgressed variants.  
801 Overall, less than 1% of all introgressed variants lie in protein coding regions, with 1973, 1682 and  
802 2353 introgressed coding variants in EAS, EUR, and SAS respectively. Within each population,  
803 approximately 30% of coding variants were non-synonymous, with very similar proportions of  
804 synonymous and non-synonymous variants across each population. Consequently, neither  
805 introgressed class was enriched (hypergeometric test) for non-synonymous variants in any of the  
806 three populations.

807

808 *Genome-wide association study hits.* We intersected all RAs and NDAs from each of the three  
809 Eurasian populations with the variants reported in the GWAS Catalog (as of July 23, 2018). Full  
810 results are provided in **File S2**.

811

### 812 **GTEX eQTL enrichment analysis.**

813 Expression quantitative trait loci (eQTL) data from GTEx v7 were downloaded from the GTEx  
814 portal (<https://www.gtexportal.org/home/datasets>) and all significant gene-eQTL pairs were  
815 extracted for each tissue. We then identified all RAs and NDAs with eQTL status. To test whether

816 RAs are enriched among the introgressed eQTL for a tissue, we calculated an odds ratio (OR)  
817 over all introgressed variants based on RA status and tissue eQTL status:

818

$$819 \quad OR = ((R/N)/(R'/N'))$$

820

821 where R is the # of RAs that are tissue eQTL; R' is the # of RA that are not tissue eQTL; N is the #  
822 of NDA that are tissue eQTL; and N' is the # of NDA that are not tissue eQTL. Sets of both R'  
823 and N' were composed of only those introgressed variants that were present in GTEx  
824 output. We tested for enrichment (or depletion) of RAs among introgressed eQTL in each tissue  
825 with the hypergeometric test and used the Bonferroni correction to account for the testing of 47  
826 tissues analyzed here ( $0.01/47=0.0002$ ).

827

### 828 **Shared RA eQTLs between Europeans and Africans**

829 To identify RAs with similar regulatory associations between populations with and without  
830 Neanderthal ancestry, we analyzed data from a previous study that identified eQTL across LCLs  
831 derived from 495 individuals (40). The LCLs were of either European (EUR; 373 lines) or African  
832 (YRI; 89 lines) ancestry; given the smaller YRI sample size, there was much lower power to detect  
833 eQTL in the African samples. We downloaded all significant exon-level expression eQTLs from  
834 the study ([https://www.ebi.ac.uk/arrayexpress/files/E-GEUV-1/analysis\\_results/](https://www.ebi.ac.uk/arrayexpress/files/E-GEUV-1/analysis_results/)). They found  
835 704,157 unique eQTL in EUR and 75,742 in YRI, and of these, 52,869 are shared. Of the shared  
836 loci, 42 are RAs, and these RAs associate with expression levels for nine genes (Table S3).

837

### 838 **MPRA analysis of RAs**

839 A recent MPRA study evaluated the regulatory impact of 32,373 variants in 3,642 known eQTL  
840 and regions identified via GWAS (42). For each variant, the MPRA quantified the expression of a  
841 reporter driven by both the reference and alternate alleles (plus 150 bp of reference genomic  
842 context) in LCLs. Expression modulating variants were identified by quantifying the “allelic skew”  
843 between the expression driven by the reference and alternate allele. This enabled the identification  
844 of hundreds of variants likely to cause observed associations between these loci and expression  
845 levels/phenotypes. To evaluate whether the MPRA data could help evaluate whether RAs have  
846 functional effects, we intersected European NDAs and RAs in introgressed haplotypes with the  
847 variants with significant combined skew ( $FDR < 0.1$ ). In total, 11 introgressed variants were tested  
848 (6 NDAs and 5 RAs; Table S4). This included all cross-population RA eQTLs in the introgressed  
849 haplotype that is associated with *HDHD5* expression. Thus, we focused our experimental  
850 validation on this locus.

851

### 852 **Experimental validation of RA regulatory function via luciferase assays**

853 To further demonstrate that the cross-population RA eQTLs associated with *HDHD5* expression  
854 function independently of the NDA in perfect LD, we evaluated the effects of four different  
855 sequences on luciferase expression in LCLs (Figure 4D).

856 Modified pGL4 luciferase constructs were generated via Gibson cloning (New  
857 England Biolabs) to contain an 1826 bp oligo corresponding to region of interest in  
858 *CECR5/HDHD5* with variants corresponding to a European reference (EUR-EUR), the  
859 introgressed NDA sequence (NDA-EUR), the RA sequences (EUR-RA), or both sets of  
860 introgressed variants (NDA-RA) (Table S5). Inserts were cloned into pGL4.27 reporter  
861 vector (Promega) as two separate blocks, as b1-EUR or b1-NDA (first 576 bp at the 3' end

862 of blocks containing either NDA or EUR specific sequence) and b2-EUR or b2-RA (1273 bp at 5'  
863 end of blocks containing either RA or EUR specific sequence) (Table S5). b1-EUR, b1-NDA, and  
864 b2-RA sequences were generated by oligonucleotide synthesis (IDT). b2-EUR variants were  
865 generated via site-directed mutagenesis using primers with EUR specific alleles (Table S6) and  
866 amplified directly from b2-RA oligo as five separate sub-regions. B2-EUR sub-regions were  
867 assembled into the pGL4.27 vector and sub-cloned into EUR-EUR and NDA-EUR pGL4  
868 constructs. Inserts were amplified to include NheI and XhoI overhangs to allow for cloning into  
869 the pGL4 reporter plasmid. The sequences of full-length inserts were confirmed by Sanger  
870 sequencing (Genewiz).

871 GM11831 B-cells were cultured in RPMI with penicillin/streptomycin and 15% fetal  
872 bovine serum. 1x10<sup>6</sup> GM11831 cells were transfected with 5 ug HDHD5-EUR-EUR-pGL4.27,  
873 HDHD5-NDA-EUR-pGL4.27, HDHD5-EUR-RA-pGL4.27, or HDHD-NDA-RA-pGL4.27  
874 along with 500 ng pRL-CMV (Renilla reporter plasmid) via electroporation (Neon Transfection  
875 System, Invitrogen). Firefly and Renilla luciferase activity was analyzed using the Dual-Glo  
876 Luciferase Assay System (Promega) and Synergy HTX MicroPlate Reader (BioTek) 19 hours post  
877 electroporation. Firefly reporter expression was normalized to Renilla luciferase activity. Statistical  
878 significance was determined through a two tailed t-test comparing fold change of the normalized  
879 luciferase activity over an unmodified (no insert) pGL4.27 reporter control.

880

#### 881 Data analysis and visualization

882 Evolutionary simulations and primary data analysis were conducted on Vanderbilt's computing  
883 cluster (ACCRE). Results were parsed and analyzed with custom python and bash scripts.  
884 Statistical tests were performed with R. Plots were generated in R, with most generated using  
885 ggplot2.

886

887

#### 888 SUPPLEMENTARY FIGURE CAPTIONS

889 **Figure S1 Demographic model used for evolutionary simulations.** The demographic model used  
890 to simulate human-Neanderthal admixture and quantify the reintroduction of lost alleles. The  
891 model and effective population sizes ( $N_e$ ) were based on previous simulations of Neanderthal  
892 admixture (20). We considered models in which mutations incurred a fitness cost (mildly purifying  
893 selection) or no fitness cost (strict neutrality). Two different admixture fractions ( $f=0.02$  and  $f=0.04$ )  
894 were used in the simulations (Methods).

895

896 **Figure S2 Simulations indicate that false positives in RA identification due to independent  
897 convergent mutations are rare.** For each simulated population, we identified all NDAs that  
898 occurred in positions with ancestral hominin variation that was lost in the Eurasian OOA. The  
899 boxplots summarize the frequencies at time of admixture (c.f. **Error! Reference source not found.**)  
900 of these potentially confounding NDAs among all sites that would be called as RAs. The incidence  
901 of these confounding mutations is slightly higher under a purely neutral model (left) than one  
902 where new mutations could be deleterious (right). Each boxplot represents 100 simulated  
903 populations with admixture fraction of 0.02.

904

905 **Figure S3 Introgressed allele class assignment decision tree and allele count summary.** Decision  
906 tree by which 1000 Genomes variants in perfect LD with Neanderthal tag SNPs were classified as  
907 RAs and NDAs. The counts of variants making it into each of the numbered steps (1-5) is  
908 summarized in the lower table.

909  
910 **Figure S4 Introgressed allele sharing across three Eurasian populations.** Venn diagram showing the  
911 fractions of each introgressed variant class that are shared between populations.

912  
913 **Figure S5 Reintroduced alleles cluster within introgressed Neanderthal haplotypes.** (A) Scatter plot  
914 of the numbers of RAs and NDAs contained on all introgressed haplotypes in EUR. The  
915 correlation between the NDA and RA content is moderate (Pearson's  $r^2=0.46$ ), with 18% of the  
916 haplotypes containing no RAs and 10% having more RAs than NDAs. (B) Scatter plot of the  
917 number of introgressed variants on each haplotype vs. haplotype length. The NDA content of a  
918 haplotype is proportional to its length ( $r^2 = 0.85$ ), but the number of RAs in each haplotype is less  
919 strongly correlated with length ( $r^2 = 0.56$ ). (C) Heat map of the fraction of NDAs and RAs in  
920 density percentiles (high to low, l-r) averaged over all introgressed Eurasian haplotypes. This  
921 information is summarized in a cumulative density function (CDF) above the heat maps. A higher  
922 fraction of all RAs are found in the most dense percentiles; this reflects the fact that RAs are often  
923 present in more dense clusters than are NDAs.

924 **Figure S6 Selection coefficients of simulated introgressed variants in Eurasians.** Selection  
925 coefficients in Eurasians from SLiM simulations with high (0.04) and low (0.02) admixture  
926 fractions. Each boxplot summarizes the average selection coefficient of all alleles in each  
927 introgressed class in each of 100 simulated modern Eurasian populations.  
928

929 **Figure S7 CADD scores for RAs (stratified as RAA and RHA) and NDAs in each of three**  
930 **populations.** Normalized CADD scores for the introgressed variant classes (RAs and NDAs) with  
931 RAs stratified into RAAs and RHAs. Considering RAAs and RHAs separately revealed that the  
932 RAAs are less deleterious than the RHAs (median scaled CADD score: RAA=1.91; RHA=2.23;  $P$   
933 =  $1.80e-89$ , Wilcoxon Rank Sum Test). This difference likely reflects the greater evolutionary  
934 conservation of RAAs. Results were similar across each superpopulation.  
935

936 **Figure S8 Max scaled CADD score per introgressed haplotype.** Maximum scaled CADD scores  
937 on each introgressed haplotype for the introgressed variant classes in each superpopulation.

938  
939 **Figure S9 RegulomeDB does not suggest a greater functional influence for NDAs compared to**  
940 **RAs.** Comparison of the fraction of NDAs and RAs in each of the RegulomeDB functional classes  
941 in order of evidence of regulatory activity.

942 **SUPPLEMENTARY TABLES:**

943 **Table S1 Counts of simulated ancient allele trajectories into modern Eurasians.**

|                            | <i>f=0.02</i> |       | <i>f=0.04</i> |       |
|----------------------------|---------------|-------|---------------|-------|
|                            | AVG           | SD    | AVG           | SD    |
| AAs in ModAfr              | 4924.47       | 50.45 | 4925.58       | 50.41 |
| AAs in ModEurA             | 4353.89       | 47.95 | 4402.27       | 53.54 |
| <i>Via AMHs only</i>       | 2536.52       | 45.17 | 2531.33       | 39.78 |
| <i>Via Neand only</i>      | 44.97         | 16.35 | 88.99         | 23.94 |
| <i>Via AMH &amp; Neand</i> | 1772.40       | 28.84 | 1781.95       | 29.52 |
| NDA in ModEurA             | 85.13         | 29.65 | 167.10        | 45.04 |

944  
 945 AAs in ModAfr: Ancestral hominin alleles persisting in modern Africans  
 946 AAs in ModEurA: Total ancestral hominin alleles persisting in modern Eurasians  
 947     *Via AMHs only:* *ancestral hominin alleles passed into Eurasians exclusively via AMHs*  
 948     *Via Neand only:* *ancestral hominin alleles passed into Eurasians exclusively via Neanderthals*  
 949     *Via AMH/Neand:* *ancestral hominin alleles passed into Eurasians via AMHs or Neanderthals or both*  
 950 NDAs in ModEurA Neanderthal derived alleles present in Eurasians

951  
 952  
 953 **Table S2 Recombination of segregating human alleles onto introgressed haplotypes rarely results**  
 954 **in false RA ascertainment.**

|                                       | <i>f=0.02</i> | <i>f=0.04</i> |
|---------------------------------------|---------------|---------------|
| False Discovery Rate (FP / (TP + FP)) | 0.009         | 0.0165        |

955  
 956  
 957



958 **Table S3. Genes associated with RA eQTL shared between EUR and YRI.**

959

| Gene ID         | HUGO Symbol of gene associated with eQTL                                                          | eQTL RAs (count)      |
|-----------------|---------------------------------------------------------------------------------------------------|-----------------------|
| ENSG00000068654 | <i>POLR1A</i>                                                                                     | RAA (2)               |
| ENSG00000069998 | <i>HDHD5</i> (previously: <i>CECR5</i> ) haloacid dehalogenase like hydrolase domain containing 5 | RAA (3), RHA (1)      |
| ENSG00000139410 | <i>SDSL</i> - Serine dehydratase-like - Homo sapiens                                              | RAA (2), RHA (2)      |
| ENSG00000152926 | <i>ZNF117</i> (previously: <i>HPF9</i> )                                                          | RHA (1)               |
| ENSG00000160193 | <i>WDR-4</i>                                                                                      | RAA (11), RHA (3)     |
| ENSG00000163755 | <i>HPS3</i> , biogenesis of lysosomal organelles complex 2 subunit 1                              | RAA (1), RHA (2)      |
| ENSG00000169609 | Chr 15 Open Reading Frame 40                                                                      | RAA (1*), RHA (1*)    |
| ENSG00000169612 | <i>RAMAC</i> (previously: <i>RAMMET</i> ), RNA guanine-7 methyltransferase activating subunit     | RAA (6 + 4*), RHA (3) |
| ENSG00000196648 | (retired)                                                                                         |                       |

960  
961 \*SNP has significant eQTL associations with 2 gene IDs

962  
963  
964  
965 **Table S4. European introgressed variants with significant MPRA evidence of modulating**  
966 **expression in LCLs.**

| Chr   | Loc (hg19) | Introgressed class | rsID        | nearest TSS  | distance from TSS | HUGO name      |
|-------|------------|--------------------|-------------|--------------|-------------------|----------------|
| chr2  | 68490970   | NDA                | rs12713637  | NM_000945    | 11318             | <i>PPP3R1</i>  |
| chr2  | 121044922  | NDA                | rs79742700  | NM_002881    | 34508             | <i>RALB</i>    |
| chr3  | 119188213  | NDA                | rs75416321  | NM_152305    | 428               | <i>POGLUT1</i> |
| chr4  | 38805942   | NDA                | rs5743566   | NM_003263    | 470               | <i>TLR1</i>    |
| chr4  | 38807328   | NDA                | rs45588337  | NM_003263    | 915               | <i>TLR1</i>    |
| chr7  | 64448291   | RHA                | rs11972247  | NM_015852    | 3123              | <i>ZNF117</i>  |
| chr9  | 101969304  | RAA                | rs77521170  | NM_033087    | 14942             | <i>ALG2</i>    |
| chr12 | 113364471  | NDA                | rs4767034   | NM_006187    | 11777             | <i>OAS3</i>    |
| chr12 | 132569521  | RHA                | rs77330556  | NR_003290    | 693               | <i>EP400NL</i> |
| chr19 | 41209256   | RAA                | rs116796128 | NM_001142555 | 11755             | <i>ADCK4</i>   |
| chr22 | 17639918   | RAA                | rs71312076  | NM_033070    | 251               | <i>HDHD5</i>   |

967  
968

969 **Table S5 Luciferase reporter insert sequences**

970

|                          |                                                                                                                                                                                                                                                                                                                                                                                                                                                                                                                                                                                                                                                                                                                                                                                                                                                                                                                                                                                                                                                                                                                                                                                                                                                                                                                                                                                                                                                                                                                                                                                                                                                                                                                                                                                                                                                                                                                                                                                                                                                                                                                                                                                                                                                                                                                           |
|--------------------------|---------------------------------------------------------------------------------------------------------------------------------------------------------------------------------------------------------------------------------------------------------------------------------------------------------------------------------------------------------------------------------------------------------------------------------------------------------------------------------------------------------------------------------------------------------------------------------------------------------------------------------------------------------------------------------------------------------------------------------------------------------------------------------------------------------------------------------------------------------------------------------------------------------------------------------------------------------------------------------------------------------------------------------------------------------------------------------------------------------------------------------------------------------------------------------------------------------------------------------------------------------------------------------------------------------------------------------------------------------------------------------------------------------------------------------------------------------------------------------------------------------------------------------------------------------------------------------------------------------------------------------------------------------------------------------------------------------------------------------------------------------------------------------------------------------------------------------------------------------------------------------------------------------------------------------------------------------------------------------------------------------------------------------------------------------------------------------------------------------------------------------------------------------------------------------------------------------------------------------------------------------------------------------------------------------------------------|
| EUR-EUR Sequence (3'-5') | <p>CTTAAGTGAAGCCGCTAACAGACTGCACAGGATTCAATTCTAAAGCTCGTGCTCAAACCTCTGTTCATCCTGCATTCTTCTTTTTCTGTCT<br/>                 CTACCGGAAGAGTCACTTGGAGACATTTTCGGGACTCTGCAGAGATGCTAGAGCCAATACAACAGTTATAAATAAGGGCGATATTTCCCT<br/>                 TATATTTTATATCCTGACAGTTTGTAAAGTCTTTTATCAACATATTTCTAATTTCAAACCTTCCACCTTGGTACAGTCTAGCTATGTGACA<br/>                 CTGGCCAAGTCACTCAGCTGCTTTGAACCTTAGCTGCTCCATATTTAAAAATCATAAAAAATAACAGCTGTTAAGAGCTTAGACTCT<br/>                 GGCACCAGACTACCTGAGTCCAGATTCTGCCACTTACCAGCTGTGTGCCCTTGGGTAAGCTGCTTAACCTCTCTGTGCCTCTGTCTCC<br/>                 ATCTATAAAATGGGAAGACTAATAATAGTACTTTTCTCGGAGTTGTTATAAAGATTATACGAATAACTGTGAAGTACTTAGAATAGTG<br/>                 CCTGGCACAAGTAAGCACTATGTGTTTTTTTCATGCAAGTAATTTGGCCGGGTGCACTGGCTCATGCTGTAATCTCACCCTCTGG<br/>                 GAGGCCAAGATGTGAGGATCATCTGAGGTCAAAAGTTCGAGACCAGCTGGCCAACATGGTGAACCCCTGTCTTACTAAAAATACAA<br/>                 AAATTAGCCGGATGTGGTGGCGGGTGCCTGTAATCCCAGCTACTCGGGAGGCTGAGACAGAAGAATCGCTGAACCCGGGAGGCGGAG<br/>                 GTTGCAGTGAGCAGAGATTGGCCACTGCACCTCAACCTGGTGACAGAGATGCCGTCTAAAAAATAAATGCAAGGATTACTGTGAA<br/>                 ATCCGTATGTTAATGTAATAATATTACTTGTGCGTTTAGAAGACAAAGTGATTCTTTTCCAGAAAAGGCCAAACGGCCCAAGGGAGC<br/>                 GTGAGAGCCGTGGATCTGACCAACCTGGTTTAGTGTCTGTGCCGTCTCCAGCTGCAGGACCTGAGAAAACGTACTTGAAACTCGT<br/>                 CAAGCTTCGGCTTCCAGCACACAAGGTACACCTTCTCAGAAAGTTCGGGGAGGCTCACACATCACTACCGCGCCGGGACAGCGG<br/>                 AGGCGCCGGCTCCAGCCCTCCTGCTCCCGCCGCGGAGCCTCCAGCGCTCAGTCGAGGTTCACAGCGAGCTGAACTGAACCCAGGCC<br/>                 GCACCAAAACCCAGGCACTTGGGGGCGGAGCACCCGAGGCGCGGCTCCCGCGCGCGGCCAGTTTCTCCACATGCAGATGAAAA<br/>                 TCACGACCCAAACGTCTCATGGTGAAATCAGAAGACCGCGAGGAAAACAGGGACGCGGAACTGCCGGGAAGCGCAGGGGCTGAC<br/>                 AAGCAGCTGGCCAGGCGCTCCACAGCGCTTCCCGCGGGAGTAGCGTTTCCAGGCGCGGAGTCAAGAGGAAAGGCGAGGCGG<br/>                 CATCCGCCCTCCAGCAAGAACCGGATGCACTCGGGCGCGACGCGTCCAGGCAGTTCCAGGAGGCTGGGATACAGCCCGGCCGCG<br/>                 CCTCTTCCCGGGCTCCCGCCCGCTCCGGCCCTGAGTGGCGAGTGGCTCGGCCAGAACCCGGACGCTCCTCACCTGAGCGGGGC<br/>                 CCACAGCATAGCACCTGCAGGCGGGGCGGCCCTGGAGCCCGCAGCCGCGCGCGCCCGCCAGCAAAGCCACGCGCCGCGCCGAG<br/>                 CGCAGCCACACAGCCCCACGCAGCCATCCGGCCGTGCGCGTGCGCACGTGCACGGCGTGCGGCCCC</p>   |
| NDA-EUR Sequence (3'-5') | <p>CTTAAGTGAAGCCGCTAACAGACTGCACAGGATTCAATTCTAAAGCTCGTGCTCAAACCTCTGTTCATCCTGCATTCTTCTTTTTCTGTCT<br/>                 CTACCGGAAGAGTCACTTGGAGACATTTTCGGGACTCTGCAGAGATGCTAGAGCCAATAAAACAGTTATAAATAAGGGCGATATTTCCCT<br/>                 TATATTTTATATCCTGACAGTTTGTAAAGTCTTTTATCAACATATTTCTAATTTCAAACCTTCCACCTTGGTACAGTCTAGCTATGTGACA<br/>                 CTGGCCAAGTCACTCAGCTGCTTTGAACCTTAGCTGCTCCATATTTAAAAATCATAAAAAATAACAGCTGTTAAGAGCTTAGACTCT<br/>                 GGCACCAGACTACCTGAGTCCAGATTCTGCCACTTACCAGCTGTGTGCCCTTGGGTAAGCTGCTTAACCTCTCTGTGCCTCTGTCTCC<br/>                 ATCTATAAAATGGGAAGACTAATAATAGTACTTTTCTCGGAGTTGTTATAAAGATTATACGAATAACTGTGAAGTACTTAGAATAGTG<br/>                 CCTGGCACAAGTAAGCACTATGTGTTTTTTTCATGCAAGTAATTTGGCCGGGTGCACTGGCTCATGCTGTAATCTCACCCTCTGG<br/>                 GAGGCCAAGATGTGAGGATCATCTGAGGTCAAAAGTTCGAGACCAGCTGGCCAACATGGTGAACCCCTGTCTTACTAAAAATACAA<br/>                 AAATTAGCCGGATGTGGTGGCGGGTGCCTGTAATCCCAGCTACTCGGGAGGCTGAGACAGAAGAATCGCTGAACCCGGGAGGCGGAG<br/>                 GTTGCAGTGAGCAGAGATTGGCCACTGCACCTCAACCTGGTGACAGAGATGCCGTCTAAAAAATAAATGCAAGGATTACTGTGAA<br/>                 ATCCGTATGTTAATGTAATAATATTACTTGTGCGTTTAGAAGACAAAGTGATTCTTTTCCAGAAAAGGCCAAACGGCCCAAGGGAGC<br/>                 GTGAGAGCCGTGGATCTGACCAACCTGGTTTAGTGTCTGTGCCGTCTCCAGCTGCAGGACCTGAGAAAACGTACTTGAAACTCGT<br/>                 CAAGCTTCGGCTTCTGACCACACAAGGTACACCTTCTCAGAAAGTTCGGGGAGGCTCACACATCACTACCGCGCCGGGCACACAGC<br/>                 AGGCGCCGGCTCCAGCCCTCCTGCTCCCGCCGCGGAGCCTCCAGCGCTCAGTCGAGGTTCACAGCGAGCTGAACTGAACCCAGGCC<br/>                 GCACCAAAACCCAGGCACTTGGGGGCGGAGCACCCGAGGCGCGGCTCCCGCGCGCGGCCAGTTTCTCCACATGCAGATGAAAA<br/>                 TCACGACCCAAACGTCTCATGGTGAAATCAGAAGACCGCGAGGAAAACAGGGACGCGGAACTGCCGGGAAGCGCAGGGGCTGAC<br/>                 AAGCAGCTGGCCAGGCGCTCCACAGCGCTTCCCGCGGGAGTAGCGTTTCCAGGCGCGGAGTCAAGAGGAAAGGCGAGGCGG<br/>                 CATCCGCCCTCCAGCAAGAACCGGATGCACTCGGGCGCGACGCGTCCAGGCAGTTCCAGGAGGCTGGGATACAGCCCGGCCGCG<br/>                 CCTCTTCCCGGGCTCCCGCCCGCTCCGGCCCTGAGTGGCGAGTGGCTCGGCCAGAACCCGGACGCTCCTCACCTGAGCGGGGC<br/>                 CCACAGCATAGCACCTGCAGGCGGGGCGGCCCTGGAGCCCGCAGCCGCGCGCGCCCGCCAGCAAAGCCACGCGCCGCGCCGAG<br/>                 CGCAGCCACACAGCCCCACGCAGCCATCCGGCCGTGCGCGTGCGCACGTGCACGGCGTGCGGCCCC</p> |

|                                                                                              |                                                                                                                                                                                                                                                                                                                                                                                                                                                                                                                                                                                                                                                                                                                                                                                                                                                                                                                                                                                                                                                                                                                                                                                                                                                                                                                                                                                                                                                                                                                                                                                                                                                                                                                                                                                                                                                                                                                                                                                           |
|----------------------------------------------------------------------------------------------|-------------------------------------------------------------------------------------------------------------------------------------------------------------------------------------------------------------------------------------------------------------------------------------------------------------------------------------------------------------------------------------------------------------------------------------------------------------------------------------------------------------------------------------------------------------------------------------------------------------------------------------------------------------------------------------------------------------------------------------------------------------------------------------------------------------------------------------------------------------------------------------------------------------------------------------------------------------------------------------------------------------------------------------------------------------------------------------------------------------------------------------------------------------------------------------------------------------------------------------------------------------------------------------------------------------------------------------------------------------------------------------------------------------------------------------------------------------------------------------------------------------------------------------------------------------------------------------------------------------------------------------------------------------------------------------------------------------------------------------------------------------------------------------------------------------------------------------------------------------------------------------------------------------------------------------------------------------------------------------------|
| <p style="writing-mode: vertical-rl; transform: rotate(180deg);">EUR-RA Sequence (3'-5')</p> | <p>CTTAAGTGAAGCCGCTAACAGACTGCACAGGATTCAATTCTAAAGCTCGTGCTCAAACCTGTGTCATCCTGCATTCTTCTTTTTCTGCT<br/> CTACCGGAAGAGTCACTTGGAGACATTTGGGACTCTGCAGAGATGCTAGAGCCAATAACAACAGTTATAAATAAGGGCGATATTTCCCT<br/> TATATTTATATCCTGACAGTTTGTAAAGTCTTTTATCAACATATTCTAATTTCAAACCTCCACCTTGGTCACGTCTAGCTATGTGACA<br/> CTGGCCAAGTCACTCAGCTGCTTTGAACCTTAGCTGCTCCATATTTAAAAATCATAAAAAATAACAGCTGTTAAGAGCTTAGACTCT<br/> GGCACCAGACTACCTGAGTTCAGATTCTGCCACTTACCAGCTGTGTGCCCTTGGGTAAGCTGCTTAACCTCTCTGTGCTCTGCTCC<br/> ATCTATAAAATGGGAAGACTAATAATAGTACTTTTCTCGGAGTTGTTATAAAGATTATACGAATAACTGTGAAGTACTTAGAATAGTG<br/> CCTGGCACAAGTAAGCACTATGTGTTTTTTTCATGCAAGTAATTTGGCCGGGTGCCTGGCTCATGCTGTAATCTCACCCTCTGG<br/> GAGGCCAAGATGTGAGGATCATCTGAGGTCAAAAAGTTCGAGACCAGCTGGCCAACATGGTGAACCTGTCTCTACTAAAAATACAA<br/> AAATTAGCCGGATGTGGTGGCGGGTGCCTGTAATCCAGCTACTCGGGAGGCTGAGACAGAAGAATCGCTTGAAACCCGGGAGGCGGAG<br/> GTTGCCGTGAGCAGAGATTGCGCCACTGCACCTCAACCTGGTGACAGAGATGCCGTCTAAAAAATAAATGCAAGGATTACTGTGAA<br/> ATCCGTATGTTAATGTAAAATATTAATCTGTGCGTTTTAGAAGACAAAGTGATTCTTTTTCCAGACAAGGCAAAACGGCCCAAGGGAGC<br/> GTGAGAGCCGTGGATCTGACCAACCTGGTTTAGTGTCTGTGCCGTCTCCAGCTGCAGGACCTGAGAAAACGTACTTGAAAACCTCGT<br/> CAAGCTTCGGCTTCTTGACCACACAAGTCCACCTTCTCAGAAGTTCGCGGGGAGGCTCACACATCCTACCAGCCGGGGCACACAGC<br/> AGGCGCCGGCTCCAGCCCTCTGCTCCCGCCCGGAGCCTCCAGCGCTCAGTCGAGGTACACAGCGAGCTGAACCTGAACCCAGGCC<br/> GCACAAACCCACAGGCACTTGGGGCGGAGCACCCGAGGCGCGGCTCCCGGCGCGCGGCCAGTTTCTCCACATGCAGATGAAAA<br/> TCACGACCCAAACGTCTCATGGTGAAATCAGAAGACGCGCAGGGAAAAACAGGGACGCGGAAACTGCCGGGAAGCGCAGGGGCTGAC<br/> AAGCAGCTGGCCAGGCGCTCCACAGAGCGCTCTCCCGCGGAGTAGCGTTTCCAGGCGCGCAGCGAGTCAGGGGAAGGACAGGGCG<br/> CATCCGCCCTCCAGCAAGAACCGGATGCACCTCGGGCGGACGACGGTCCAGGCAGTTCCAGGAGGCGGGGATACCAGCCCGGCCCG<br/> CCTCCTTCCCGGGCTCCCGCCCGCTCCCGCCCTGAGTGGCGAGTGGCTCGGCCAGAACCAGGCTCCTCACCTGAGGGGGG<br/> CCACAGCATAGCACCTGCAGGCGGGGCGGCCCTGGAGCCCCGAGCCGCGCGCGCCCGCCAGCAAAGCCACGCGCCGCGCCGAG<br/> CGCAGCCACACAGCCCCACGAGCCATCCGGCCGTGCGCGTGCACAGTGCACGGCGTGCGGCCCC</p> |
| <p style="writing-mode: vertical-rl; transform: rotate(180deg);">NDA-RA Sequence (3'-5')</p> | <p>CTTAAGTGAAGCCGCTAACAGACTGCACAGGATTCAATTCTAAAGCTCGTGCTCAAACCTGTGTCATCCTGCATTCTTCTTTTTCTGCT<br/> CTACCGGAAGAGTCACTTGGAGACATTTGGGACTCTGCAGAGATGCTAGAGCCAATAAAAACAGTTATAAATAAGGGCGATATTTCCCT<br/> TATATTTATATCCTGACAGTTTGTAAAGTCTTTTATCAACATATTCTAATTTCAAACCTCCACCTTGGTCACGTCTAGCTATGTGACA<br/> CTGGCCAAGTCACTCAGCTGCTTTGAACCTTAGCTGCTCCATATTTAAAAATCATAAAAAATAACAGCTGTTAAGAGCTTAGACTCT<br/> GGCACCAGACTACCTGAGTTCAGATTCTGCCACTTACCAGCTGTGTGCCCTTGGGTAAGCTGCTTAACCTCTCTGTGCTCTGCTCC<br/> ATCTATAAAATGGGAAGACTAATAATAGTACTTTTCTCGGAGTTGTTATAAAGATTATACGAATAACTGTGAAGTACTTAGAATAGTG<br/> CCTGGCACAAGTAAGCACTATGTGTTTTTTTCATGCAAGTAATTTGGCCGGGTGCCTGGCTCATGCTGTAATCTCACCCTCTGG<br/> GAGGCCAAGATGTGAGGATCATCTGAGGTCAAAAAGTTCGAGACCAGCTGGCCAACATGGTGAACCTGTCTCTACTAAAAATACAA<br/> AAATTAGCCGGATGTGGTGGCGGGTGCCTGTAATCCAGCTACTCGGGAGGCTGAGACAGAAGAATCGCTTGAAACCCGGGAGGCGGAG<br/> GTTGCCGTGAGCAGAGATTGCGCCACTGCACCTCAACCTGGTGACAGAGATGCCGTCTAAAAAATAAATGCAAGGATTACTGTGAA<br/> ATCCGTATGTTAATGTAAAATATTAATCTGTGCGTTTTAGAAGACAAAGTGATTCTTTTTCCAGACAAGGCAAAACGGCCCAAGGGAGC<br/> GTGAGAGCCGTGGATCTGACCAACCTGGTTTAGTGTCTGTGCCGTCTCCAGCTGCAGGACCTGAGAAAACGTACTTGAAAACCTCGT<br/> CAAGCTTCGGCTTCTTGACCACACAAGTCCACCTTCTCAGAAGTTCGCGGGGAGGCTCACACATCCTACCAGCCGGGGCACACAGC<br/> AGGCGCCGGCTCCAGCCCTCTGCTCCCGCCCGGAGCCTCCAGCGCTCAGTCGAGGTACACAGCGAGCTGAACCTGAACCCAGGCC<br/> GCACAAACCCACAGGCACTTGGGGCGGAGCACCCGAGGCGCGGCTCCCGGCGCGCGGCCAGTTTCTCCACATGCAGATGAAAA<br/> TCACGACCCAAACGTCTCATGGTGAAATCAGAAGACGCGCAGGGAAAAACAGGGACGCGGAAACTGCCGGGAAGCGCAGGGGCTGAC<br/> AAGCAGCTGGCCAGGCGTCCACAGAGCGCTTCCCGCGGAGTAGCGTTTCCAGGCGCGCAGCGAGTCAGGGGAAGGACAGGGCG<br/> CATCCGCCCTCCAGCAAGAACCGGATGCACCTCGGGCGGACGACGGTCCAGGCAGTTCCAGGAGGCGGGGATACCAGCCCGGCCCG<br/> CCTCCTTCCCGGGCTCCCGCCCGCTCCCGCCCTGAGTGGCGAGTGGCTCGGCCAGAACCAGGCTCCTCACCTGAGGGGGG<br/> CCACAGCATAGCACCTGCAGGCGGGGCGGCCCTGGAGCCCCGAGCCGCGCGCGCCCGCCAGCAAAGCCACGCGCCGCGCCGAG<br/> CGCAGCCACACAGCCCCACGAGCCATCCGGCCGTGCGCGTGCACAGTGCACGGCGTGCGGCCCC</p>   |
| <p style="writing-mode: vertical-rl; transform: rotate(180deg);">b1-EUR (3'-5')</p>          | <p>CTTAAGTGAAGCCGCTAACAGACTGCACAGGATTCAATTCTAAAGCTCGTGCTCAAACCTGTGTCATCCTGCATTCTTCTTTTTCTGCT<br/> CTACCGGAAGAGTCACTTGGAGACATTTGGGACTCTGCAGAGATGCTAGAGCCAATAACAACAGTTATAAATAAGGGCGATATTTCCCT<br/> TATATTTATATCCTGACAGTTTGTAAAGTCTTTTATCAACATATTCTAATTTCAAACCTCCACCTTGGTCACGTCTAGCTATGTGACA<br/> CTGGCCAAGTCACTCAGCTGCTTTGAACCTTAGCTGCTCCATATTTAAAAATCATAAAAAATAACAGCTGTTAAGAGCTTAGACTCT<br/> GGCACCAGACTACCTGAGTTCAGATTCTGCCACTTACCAGCTGTGTGCCCTTGGGTAAGCTGCTTAACCTCTCTGTGCTCTGCTCC<br/> ATCTATAAAATGGGAAGACTAATAATAGTACTTTTCTCGGAGTTGTTATAAAGATTATACGAATAACTGTGAAGTACTTAGAATAGTG<br/> CCTGGCACAAGTAAGCACTATGTGTTTTTTTCATGCAAGTAATTTGGCCGGGTGCCTGGCTCATGCTGTAATCTCACCCTCTGG<br/> GAGGCCAAGATGTGAGGATCATCTGAGGTCAAAAAGTTCGAGACCAGCTGGCCAACATGGTGAACCTGTCTCTACTAAAAATACAA<br/> AAATTAGCCGGATGTGGTGGCGGGTGCCTGTAATCCAGCTACTCGGGAGGCTGAGACAGAAGAATCGCTTGAAACCCGGGAGGCGGAG<br/> GTTGCCGTGAGCAGAGATTGCGCCACTGCACCTCAACCTGGTGACAGAGATGCCGTCTAAAAAATAAATGCAAGGATTACTGTGAA<br/> ATCCGTATGTTAATGTAAAATATTAATCTGTGCGTTTTAGAAGACAAAGTGATTCTTTTTCCAGACAAGGCAAAACGGCCCAAGGGAGC<br/> GTGAGAGCCGTGGATCTGACCAACCTGGTTTAGTGTCTGTGCCGTCTCCAGCTGCAGGACCTGAGAAAACGTACTTGAAAACCTCGT<br/> CAAGCTTCGGCTTCTTGACCACACAAGTCCACCTTCTCAGAAGTTCGCGGGGAGGCTCACACATCCTACCAGCCGGGGCACACAGC<br/> AGGCGCCGGCTCCAGCCCTCTGCTCCCGCCCGGAGCCTCCAGCGCTCAGTCGAGGTACACAGCGAGCTGAACCTGAACCCAGGCC<br/> GCACAAACCCACAGGCACTTGGGGCGGAGCACCCGAGGCGCGGCTCCCGGCGCGCGGCCAGTTTCTCCACATGCAGATGAAAA<br/> TCACGACCCAAACGTCTCATGGTGAAATCAGAAGACGCGCAGGGAAAAACAGGGACGCGGAAACTGCCGGGAAGCGCAGGGGCTGAC<br/> AAGCAGCTGGCCAGGCGTCCACAGAGCGCTTCCCGCGGAGTAGCGTTTCCAGGCGCGCAGCGAGTCAGGGGAAGGACAGGGCG<br/> CATCCGCCCTCCAGCAAGAACCGGATGCACCTCGGGCGGACGACGGTCCAGGCAGTTCCAGGAGGCGGGGATACCAGCCCGGCCCG<br/> CCTCCTTCCCGGGCTCCCGCCCGCTCCCGCCCTGAGTGGCGAGTGGCTCGGCCAGAACCAGGCTCCTCACCTGAGGGGGG<br/> CCACAGCATAGCACCTGCAGGCGGGGCGGCCCTGGAGCCCCGAGCCGCGCGCGCCCGCCAGCAAAGCCACGCGCCGCGCCGAG<br/> CGCAGCCACACAGCCCCACGAGCCATCCGGCCGTGCGCGTGCACAGTGCACGGCGTGCGGCCCC</p>   |

|               |                                                                                                                                                                                                                                                                                                                                                                                                                                                                                                                                                                                                                                                                                                                                                                                                                                                                                                                                                                                                                                                                                                                                                                                                                                                                                                                                                                                                                                                                                                                                                                                                                   |
|---------------|-------------------------------------------------------------------------------------------------------------------------------------------------------------------------------------------------------------------------------------------------------------------------------------------------------------------------------------------------------------------------------------------------------------------------------------------------------------------------------------------------------------------------------------------------------------------------------------------------------------------------------------------------------------------------------------------------------------------------------------------------------------------------------------------------------------------------------------------------------------------------------------------------------------------------------------------------------------------------------------------------------------------------------------------------------------------------------------------------------------------------------------------------------------------------------------------------------------------------------------------------------------------------------------------------------------------------------------------------------------------------------------------------------------------------------------------------------------------------------------------------------------------------------------------------------------------------------------------------------------------|
| b1_NDA(3'-5') | <p>CTTAAGTGAAGCCGCTAACAGACTGCACAGGATTCAATTTCTAAAGCTCGTGCTCAAACCTCTGTATCCTGCATTTCTTTTTTCTGCT<br/>                 CTACCGGAAGAGTCACTTGGAGACATTTCCGGACTCTGCAGAGATGCTAGAGCCAATAAAACAGTTATAAATAAGGGCGATATTTCTT<br/>                 TATATTTATATCCTGACAGTTTGTAAAGTCTTTTATCAACATATTCTAATTTCAAACCTCCACCTTGGTCACGTCTAGCTATGTGACA<br/>                 CTGGCCAAGTCACTCAGCTGCTTTGAACCTTAGCTGCTCCATATTTAAAAATCATAAAAATAATACAGCTGTTAAGAGCTTAGACTCT<br/>                 GGCACCAGACTACTGAGTTCAGATTCTGCCACTTACCAGCTGTGTGCCCTTGGGTAAAGCTGCTTAACCTCTCTGTGCTCTGCTCC<br/>                 ATCTATAAAATGGGAAGACTAATAATAGTACTTTCTCGGAGTTGTTATAAAGATTATACGAATAACTGTGAAGTACTTAGAATAGTG<br/>                 CCTGGCACAAGTAAGCACTATGTGTTTTTTTTCATGCAAGTAATTTGG</p>                                                                                                                                                                                                                                                                                                                                                                                                                                                                                                                                                                                                                                                                                                                                                                                                                                                                          |
| b2-EUR(3'-5') | <p>TTTTTTTTCATGCAAGTAATTTGGCCGGGTGCACTGGCTCATGCCTGTAATCTCACCCTCTGGGAGGCCAAGATGTGAGGATCATCTG<br/>                 AGGTCAAAAAGTTCGAGACCAGCCTGGCCAACATGGTGAACCCCTGTCTCTACTAAAAATACAAAAATTAGCCGGATGTGGTGGCGGGT<br/>                 GCCTGTAATCCCAGTACTCGGGAGGCTGAGACAGAAGAATCGCTTGAACCCGGGAGGCGGAGGTTGCAGTGAGCAGAGATTGCGCCA<br/>                 CTGCACTCCAACCTGGTGACAGAGATGCCGTCTAAAAAATAAATGCAAGGATTACTGTGAAATCCGTATGTTAATGTAATAATTA<br/>                 CTTGTGCGTTTAGAAGACAAAGTGATTCCTTTTTCCAGAAAAGGCAAAACGGCCCAAGGGAGCGTGAGAGCCGTGGATCTGACCAACC<br/>                 TGGTTTGTGTCCTGTGCCGTCTCCAGCTGCAGGACCTGAGAAAACGTAAGTGAAGTCAAGCTTCGGCTTCCTGACCACACA<br/>                 AGGTCACACCTTCTCAGAAGTTGCGGGGAGGCTCACACATCACTACCGCGCCGGGCACACAGCAGGCGCCGGCTCCAGCCCTCCTGCT<br/>                 CCCGCCCCGGGAGCCTCCAGCGCTCAGTCGAGGTCACAGCGAGCTGAACTGAACCCAGGCCCCGACCAAACCCACAGGCACTTGGGG<br/>                 GCGGAGCACCCCGCAGGCGCGGCTCCCGGCGCGCGGCCAGTTTCTCCACATGCAGATGAAAAATCACGACCCAAACGTCCTCATGGTG<br/>                 GAAATCAGAAGACGCGCAGGGAAAAACAGGGACCGGAACTGCCGGGAAGCGCAGGGGCTGACAAGCAGCCTGGCCAGGCGCTCCCA<br/>                 CGAGCGCTCTCCCGGGGAGTAGCGTTTCCGAGGCCGCGCAGCGAGTCAGAGGAAGGCAGGGCGCATCCGCCCTCCAGCAAGAACGCGA<br/>                 TGCACTCGGGCGGACGACGGTCCAGGAGTTCAGGAGGCTGGGATACAGCCCGCCGCCCTCCTTCCCGCGGCTCCCGGCC<br/>                 CGCCTCCGGCCCTGAGTGGCGAGTGGCTCGGCCAGAACCCGGACGTCCTCACCTGAGCGGGGCCACAGCATAGCACTGCAGGCGGG<br/>                 GCGGCCCTGGAGCCCGCAGCCGCGCGCCGCCAGCAAGCCACGCGCCGCCGCGCCGAGCGCAGCCACACAGCCCAAGCGAGCC<br/>                 ATCCGGCCGTGCGCGTGCACGTCACGGCGTGCGGCC</p> |
| b2-RA(3'-5')  | <p>TTTTTTTTCATGCAAGTAATTTGGCCGGGTGCACTGGCTCATGCCTGTAATCTCACCCTCTGGGAGGCCAAGATGTGAGGATCATCTG<br/>                 AGGTCAAAAAGTTCGAGACCAGCCTGGCCAACATGGTGAACCCCTGTCTCTACTAAAAATACAAAAATTAGCCGGATGTGGTGGCGGGT<br/>                 GCCTGTAATCCCAGTACTCGGGAGGCTGAGACAGAAGAATCGCTTGAACCCGGGAGGCGGAGGTTGCCGTGAGCAGAGATTGCGCCA<br/>                 CTGCACTCCAACCTGGTGACAGAGATGCCGTCTAAAAAATAAATGCAAGGATTACTGTGAAATCCGTATGTTAATGTAATAATTA<br/>                 CTTGTGCGTTTAGAAGACAAAGTGATTCCTTTTTCCAGACAAGGCAAAACGGCCCAAGGGAGCGTGAGAGCCGTGGATCTGACCAACC<br/>                 TGGTTTGTGTCCTGTGCCGTCTCCAGCTGCAGGACCTGAGAAAACGTAAGTGAAGTCAAGCTTCGGCTTCCTGACCACACA<br/>                 AGGTCACACCTTCTCAGAAGTTGCGGGGAGGCTCACACATCACTACCGCGCCGGGCACACAGCAGGCGCCGGCTCCAGCCCTCCTGCT<br/>                 CCCGCCCCGGGAGCCTCCAGCGCTCAGTCGAGGTCACAGCGAGCTGAACTGAACCCAGGCCCCGACCAAACCCACAGGCACTTGGGG<br/>                 GCGGAGCACCCCGCAGGCGCGGCTCCCGGCGCGCGGCCAGTTTCTCCACATGCAGATGAAAAATCACGACCCAAACGTCCTCATGGTG<br/>                 GAAATCAGAAGACGCGCAGGGAAAAACAGGGACCGGAACTGCCGGGAAGCGCAGGGGCTGACAAGCAGCCTGGCCAGGCGCTCCCA<br/>                 CGAGCGCTCTCCCGGGGAGTAGCGTTTCCGAGGCCGCGCAGCGAGTCAGGGGAAGGCAGGGCGCATCCGCCCTCCAGCAAGAACGCGA<br/>                 TGCACTCGGGCGGACGACGGTCCAGGAGTTCAGGAGGCTGGGATACAGCCCGCCGCCCTCCTTCCCGCGGCTCCCGGCC<br/>                 CGCCTCCGGCCCTGAGTGGCGAGTGGCTCGGCCAGAACCCGGACGTCCTCACCTGAGCGGGGCCACAGCATAGCACTGCAGGCGGG<br/>                 GCGGCCCTGGAGCCCGCAGCCGCGCGCCGCCAGCAAGCCACGCGCCGCCGCGCCGAGCGCAGCCACACAGCCCAAGCGAGCC<br/>                 ATCCGGCCGTGCGCGTGCACGTCACGGCGTGCGGCC</p> |

971  
972

973

974 **Table S6 Luciferase primer sequences**

975

|                                                               | Primer          | Sequence (5'-3')                                               |
|---------------------------------------------------------------|-----------------|----------------------------------------------------------------|
| Primers for Sanger Sequencing                                 | pG4.27_seq_FP1  | CAGGTGCCAGAACATTTCTC                                           |
|                                                               | pGL4.27_seq_FP2 | CCTCTAGTGTCTAAGCTTGG                                           |
|                                                               | pGL4.27_seq_FP3 | CGCGTCTTCTGATTTCCACC                                           |
|                                                               | pGL4.27_seq_R   | CTAAACCAGGTTGGTCAGATC                                          |
| Primers to produced b2-EUR sub-regions                        | B2.1-EUR-F      | GCAGTACTTTTTTTCATGCAAGTAATTTGGCCGG                             |
|                                                               | B2.1-EUR-R      | CTCTGCTCACTGCAACCTCCG                                          |
|                                                               | B2.2-EUR-F      | GCGGAGGTTGCAGTGAGCAGAGATTG                                     |
|                                                               | B2.2-EUR-R      | GGCCGTTTTGCCTTTTCTGGAAAAAGG                                    |
|                                                               | B2.3-EUR-F      | CCTTTTTCCAGAAAAGGCCAAAACGGCC                                   |
|                                                               | B2.3-EUR-R      | CCTGCCTTCTCTGACTCGCTG                                          |
|                                                               | B2.4-EUR-F      | CAGCGAGTCAGAGGAAGGCAGGG                                        |
|                                                               | B2.4-EUR-R      | CTGGTATCCCAGCCTCCTGGGAAC                                       |
|                                                               | B2.5-EUR-F      | GTTCCCAGGAGGCTGGGATACCAGC                                      |
|                                                               | B2.5-EUR-R      | GAATCTGAGCTAGTGGGGCCGCAC                                       |
| Primers to create restriction overhangs on b2-EUR sub regions | B2.1-EURwOH     | TCGAGCGATCGGAGCTCCTAGCAGTACTTTTTTTCAT<br>GCAAGTAATTTGGCCGGGTGC |
|                                                               | B2.5-EURwOH     | GGCTCCGGTCTAGAACTAGAGCTAGTGGGGCCGCAC                           |
| Primers to create NheI restriction site on b2-EUR and b2-RA   | B2-EUR/RAwOH-F  | GCAGTACTTTTTTTCATGCAAGTAATTTGGCCGGGTG<br>CACT                  |
|                                                               | B2-EUR/RAwOH-R  | CTGGCCGGTACCTGAGCTCGGAATCTGAGCTAGTGGG<br>GGC                   |
| Primers to create XhoI restriction site on b1-NDA and b1-EUR  | B1-EUR/NDAwOH-F | GAGGCCAGATCTTGATATCCCTTAAGTGAAGCCGCTA<br>ACAG                  |
|                                                               | B1-EUR/NDAwOH-R | CCAAATTACTTGCATGAAAAAACACATAGTGCTTAC<br>TTTGTGCCAG             |
| Primers used to amplify b1-NDA and b1-EUR                     | B1-EUR/NDA-F    | CTTAAGTGAAGCCGCTAACAG                                          |
|                                                               | B1-EUR/NDA-R    | CCAAATTACTTGCATGAAAAAACAC                                      |



976

977 **SUPPLEMENTARY FILE LIST:**

978 **File S1 List of NDAs and RAs for each Eurasian population**

979 **File S2 Table of GWAS hits for NDAs and RAs**

980

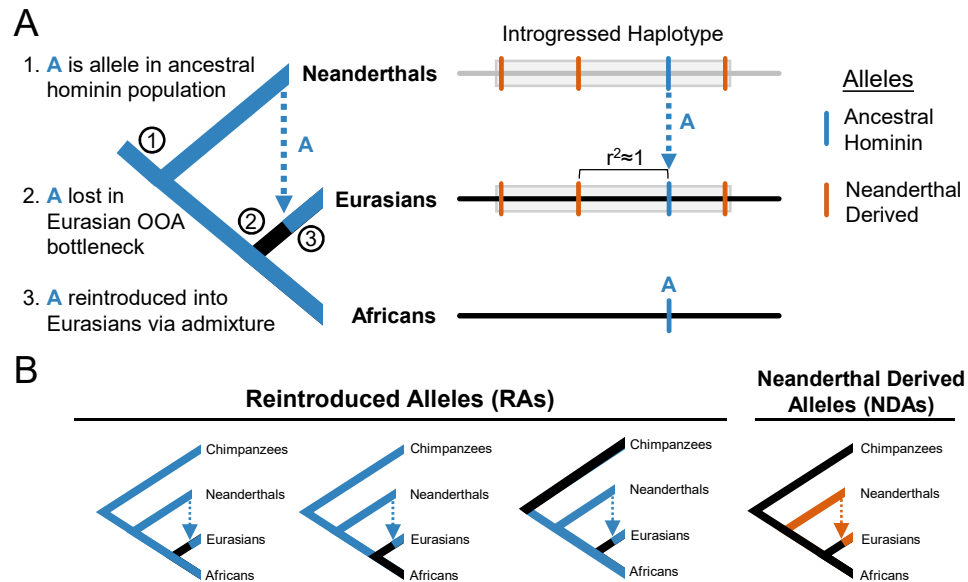

**Figure 1. Schematic of the reintroduction of alleles lost in the Eurasian out of Africa (OOA) bottleneck by Neanderthal introgression.** (A) Illustration of the evolutionary trajectory and resulting genomic signature of an allele **A** (blue) that was: (1) segregating in the ancestors of modern humans and Neanderthals, (2) lost to the ancestors of Eurasians in the human OOA bottleneck, and (3) reintroduced to Eurasians through Neanderthal admixture. Consequently, reintroduced alleles (RAs) are expected to be in high linkage disequilibrium with some Neanderthal-derived alleles (NDAs; orange) in introgressed haplotypes (gray) in modern Eurasians. (B) Schematics of the different evolutionary histories of interest in this paper. All alleles lost in the Eurasian OOA bottleneck and reintroduced by Neanderthal introgression are referred to as RAs. Alleles that appeared in the Neanderthal lineage, were not present in the ancestors of humans and Neanderthals, and only exist on introgressed haplotypes in modern humans are referred to as Neanderthal-derived alleles (NDAs).

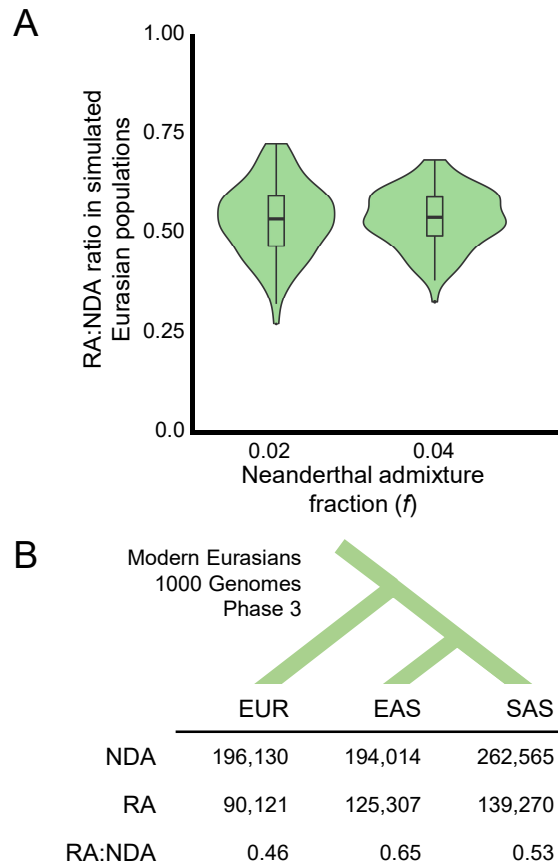

**Figure 2. Neanderthal introgression reintroduced thousands of alleles lost in the OOA bottleneck to Eurasian populations.** (A) The ratios of RAs to NDAs over 100 simulated Eurasian populations. The simulations predict approximately one RA for every two NDAs, and these estimates are robust to changes in the simulated Neanderthal admixture fraction. Misclassification of non-RAs as RAs due to independent, convergent mutations is extremely rare (**Figure S2**) and the overall false discovery rate for LD-based RA identification is below ~1% (**Table S2**). (B) The number of RAs and NDAs in each Eurasian 1000 Genomes population (EAS = East Asian; EUR = European ancestry; SAS = South Asian) identified by our pipeline (**Figure S3**; Methods). Neanderthal admixture reintroduced over 200,000 alleles lost in the human OOA bottleneck into the ancestors of 1000 Genomes populations, and the observed RA-to-NDAs ratio is consistent with the simulations.

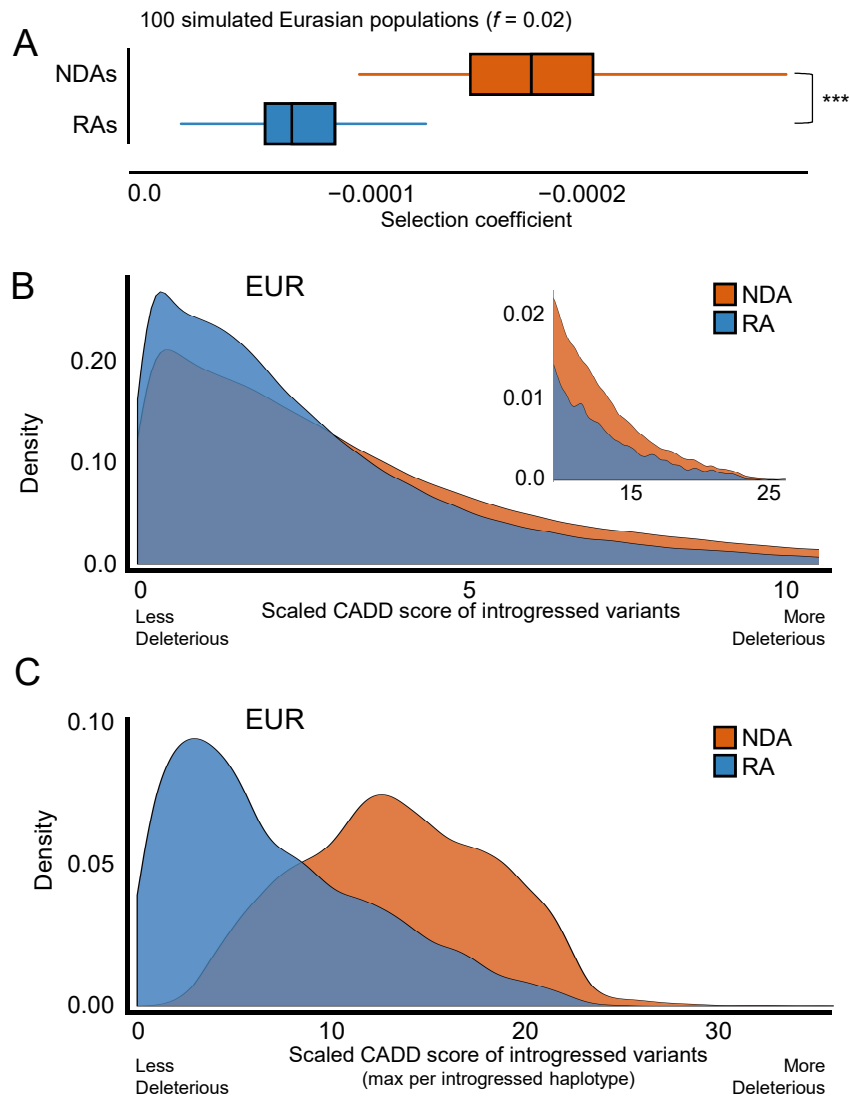

**Figure 3. Reintroduced alleles have different fitness effects than Neanderthal-derived alleles.** (A) Simulations identify weak selection against both NDAs and RAs, but the RAs persisting in modern Eurasian populations were consistently less deleterious than NDAs over 200 simulations (median selection coefficient RA= $7.7e-5$ ; NDA= $1.9e-4$ ,  $P \approx 0$ , Wilcoxon rank sum test). (B) In modern Eurasian populations, RAs are predicted to be significantly less deleterious than NDAs by CADD (median scaled CADD: NDA=2.7; RA=2.1;  $P \approx 0$ ). The upper tail of highly deleterious mutations is highlighted in the inset. Results are similar for unscaled scores. (C) At the haplotype level, the maximum RA CADD score per haplotype is significantly lower than for NDAs (median scaled max CADD: NDA=13.3; RA=5.8;  $P \approx 0$ ). This is in part due to the overall difference demonstrated in (B) and to the greater number of NDAs per haplotype. RAs are rarely the most deleterious variant per haplotype. Results shown are for Europeans (EUR); results in East and South Asian populations are similar (Figure S7, Figure S8).

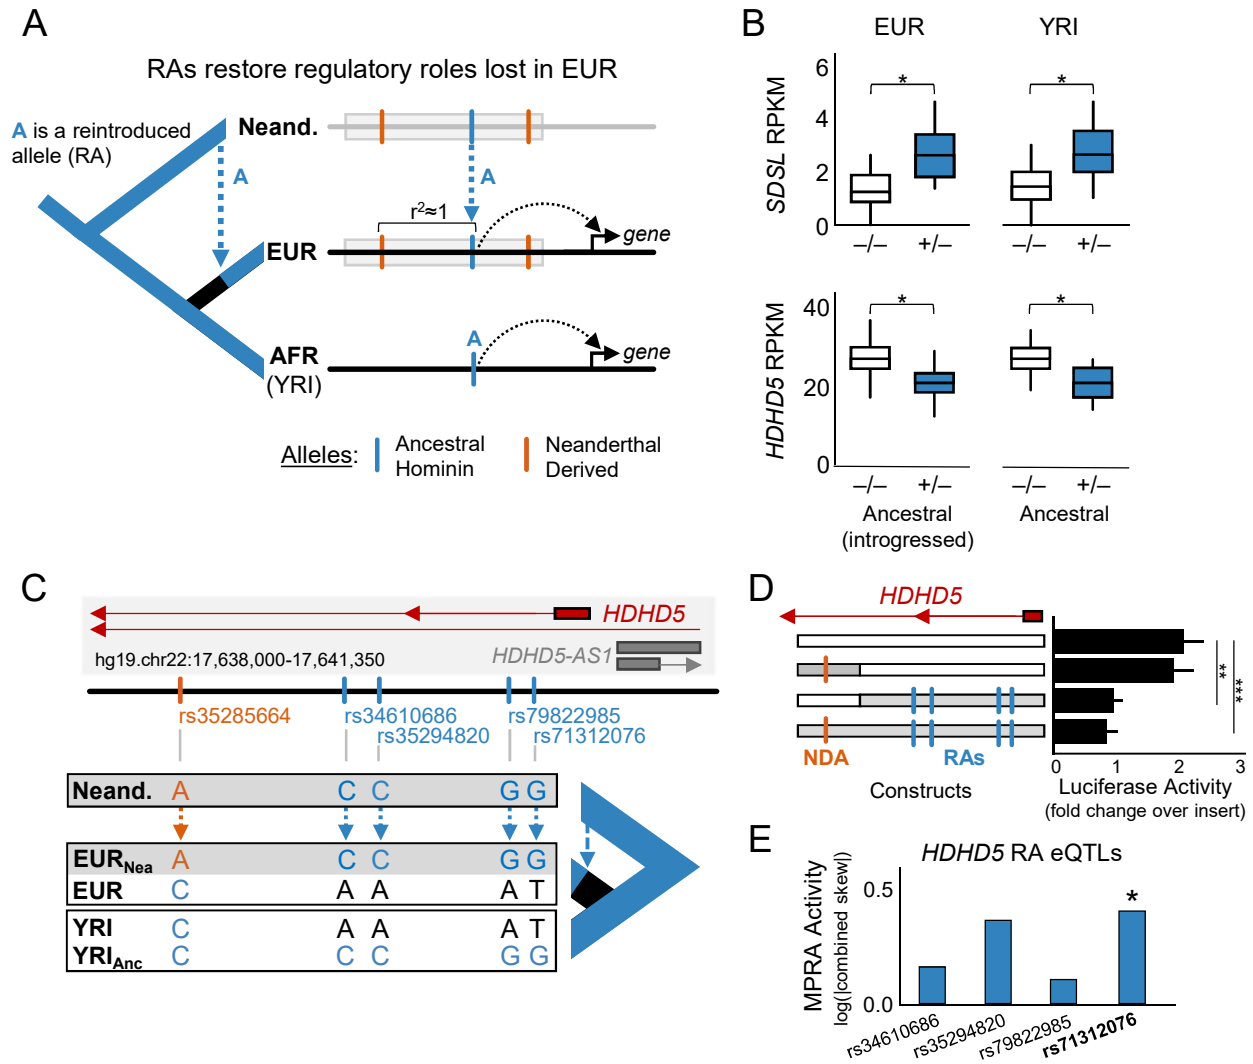

**Figure 4. Reintroduced alleles restore regulatory functions lost in the Eurasian OOA bottleneck.**

(caption is on following page)

**Figure 4. Reintroduced alleles restore regulatory functions lost in the Eurasian OOA bottleneck.** (A) Conceptual model of restored regulatory function resulting from Neanderthal admixture. Here, allele A is a cis-acting regulatory variant that is exclusively found on introgressed haplotypes (gray) in modern Europeans (EUR). Allele A is also present in sub-Saharan Yoruba individuals (YRI) lacking Neanderthal ancestry. It displays similar cis-regulatory activity in both populations. This pattern suggests that allele A is an RA in Europeans and that it influences gene regulation independent of the associated NDAs. (B) Two examples of genes (*SDSL* and *HDHD5*) with consistent expression differences (measured in RPKM) associated with RA eQTLs in EUR and the corresponding allele in YRI LCLs. The RAs are present only on introgressed haplotypes in EUR, and the NDAs associated with the RAs are not present in YRI. This suggests that these RAs restore lost gene regulatory functions in Europeans. (C) Schematic of the *HDHD5* locus highlighting the locations of one NDA (orange) and four RA eQTLs (blue) in the introgressed haplotype and the different combinations of these alleles present in EUR, YRI, and Neanderthals. (D) Luciferase activity driven by constructs carrying different combinations of alleles present in the *HDHD5* locus. We assayed four constructs containing: 1) no introgressed alleles, 2) only the NDA, 3) only the RAs, and 4) all introgressed variants. Results are summarized over three replicates. As expected from the eQTL data, constructs lacking RAs drive significantly stronger expression (~2x baseline) than constructs containing RAs (~1x baseline; two-tailed t-test,  $P < 0.01$  (\*\*)) and  $P < 0.001$  (\*\*\*)). The regulatory effect of the RAs is independent of the presence the NDA found in introgressed EUR haplotypes. (E) Regulatory activity in a massively parallel reporter assay (MPRA) for the four *HDHD5* RA eQTLs reveals that rs71312076 has significant regulatory effects when placed in the non-introgressed European background sequence. The other three RAs did not drive significant regulatory activity.



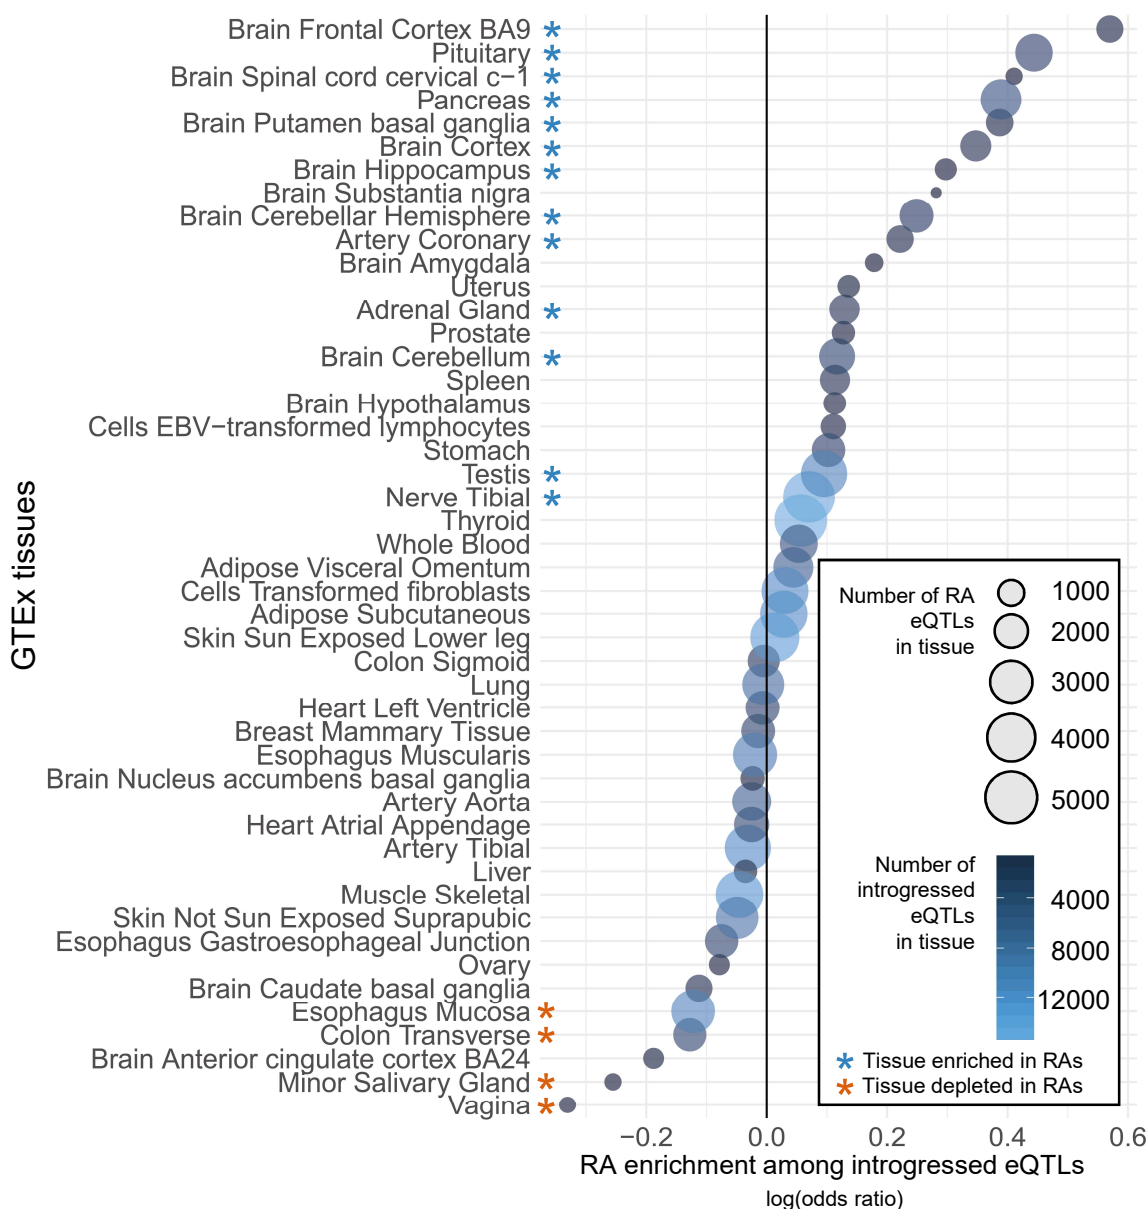

**Figure 5. Reintroduced alleles are significantly enriched among introgressed eQTLs in brain and several other tissues.** Bubble plot quantifying the enrichment for eQTL activity among EUR RAs compared to all introgressed eQTL in each GTEx v7 tissue. Of the 48 tissues considered, RAs were significantly enriched compared to NDA eQTL in 13 tissues, and significantly depleted in four ( $P < 0.01$ , hypergeometric test after Bonferroni correction). The strongest enrichment for RA eQTLs was in the frontal cortex. Brain regions were enriched among the 13 tissues with RA eQTL enrichment (7 of 13,  $P = 0.0144$ , hypergeometric test).

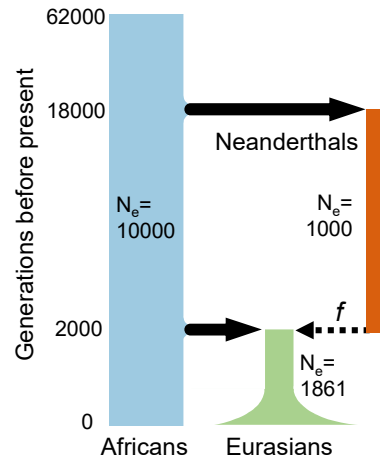

**Figure S1. Demographic model used for evolutionary simulations.** The demographic model used to simulate human–Neanderthal admixture and quantify the reintroduction of lost alleles. The model and effective population sizes ( $N_e$ ) were based on previous simulations of Neanderthal admixture (Harris and Nielsen, 2016). We considered models in which mutations incurred a fitness cost (mildly purifying selection) or no fitness cost (strict neutrality). Two different admixture fractions ( $f=0.02$  and  $f=0.04$ ) were used in the simulations (Methods).

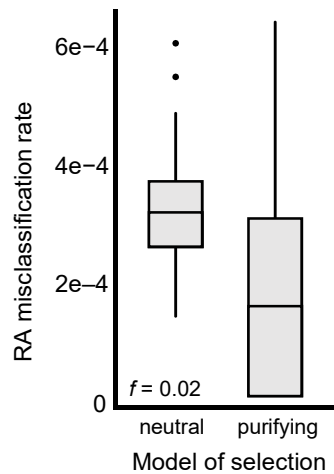

**Figure S2 Simulations indicate that false positives in RA identification due to independent convergent mutations are rare.** For each simulated population, we identified all NDAs that occurred in positions with ancestral hominin variation that was lost in the Eurasian OOA. The boxplots summarize the frequencies at time of admixture (c.f. Figure S1) of these potentially confounding NDAs among all sites that would be called as RAs. The incidence of these confounding mutations is slightly higher under a purely neutral model (left) than one where new mutations could be deleterious (right). Each boxplot represents 100 simulated populations with admixture fraction of 0.02.

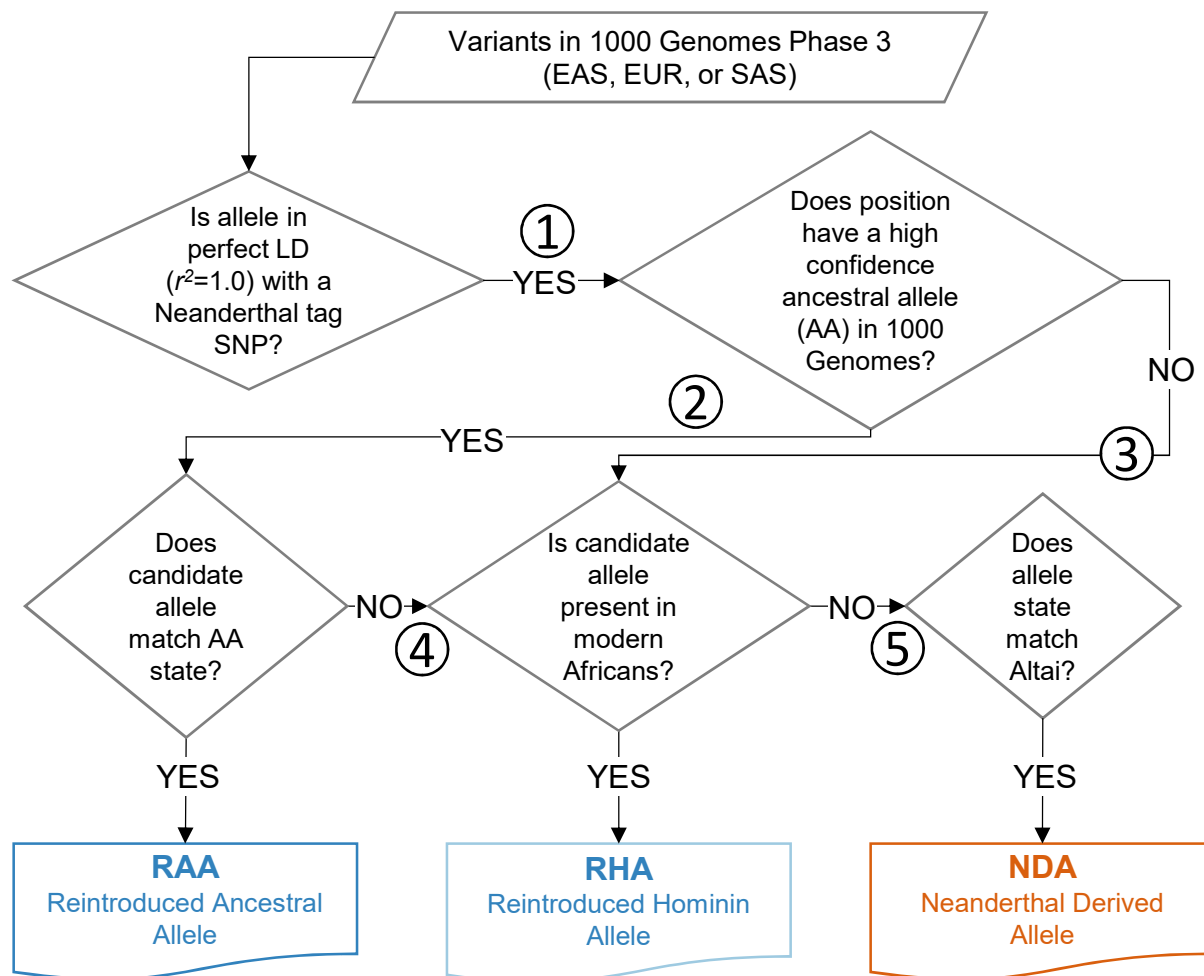

**Allele counts at each step**

| Step#        | EAS    | EUR    | SAS    |
|--------------|--------|--------|--------|
| 1            | 225769 | 217999 | 282678 |
| 2            | 203933 | 197368 | 256104 |
| 3            | 21836  | 20631  | 26574  |
| 4            | 139878 | 149066 | 183104 |
| 5            | 100464 | 127880 | 143410 |
| RA [ RAA     | 64055  | 48302  | 73000  |
| RHA          | 61250  | 41817  | 66268  |
| NDA*         | 194014 | 196130 | 262565 |
| unclassified | 38855  | 64046  | 60507  |

\*NDA totals include both I Neanderthal “tag SNPs” (EAS:132405, EUR:132296, SAS:179662) as well as the NDAs predicted from the present pipeline.

**Figure S3 Introgressed allele class assignment decision tree and allele count summary.**

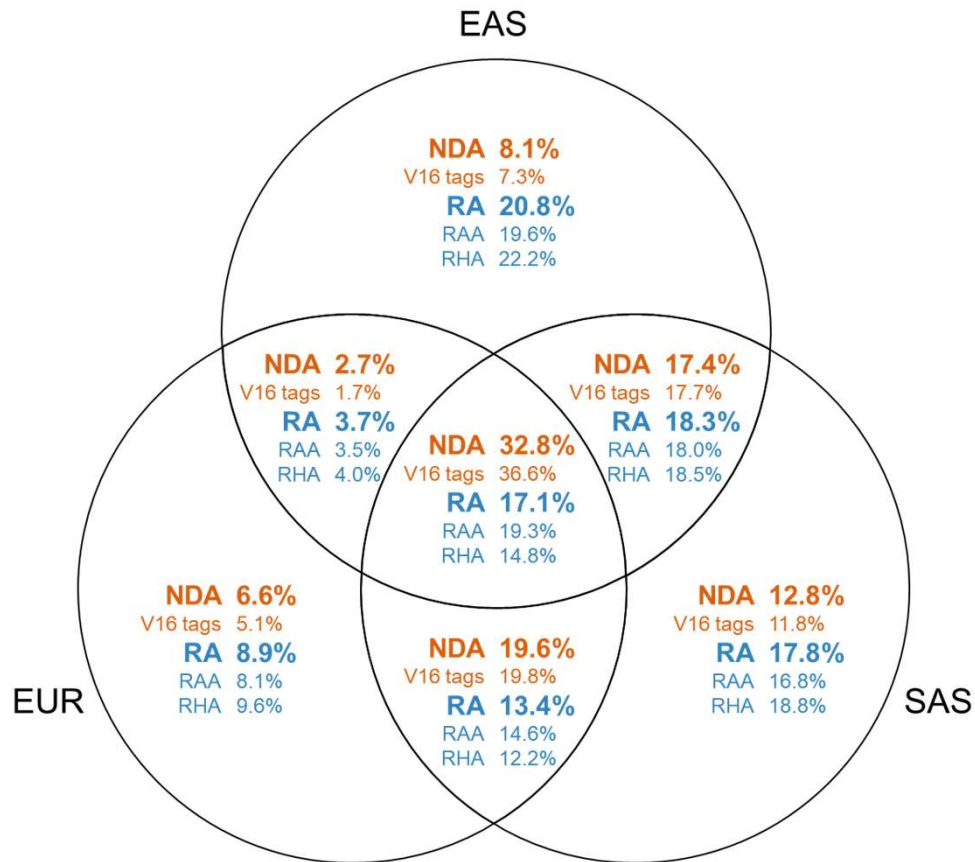

**Figure S4. Introgressed allele sharing across three Eurasian populations.** Venn diagram showing the fractions of each introgressed variant class that are shared between populations.

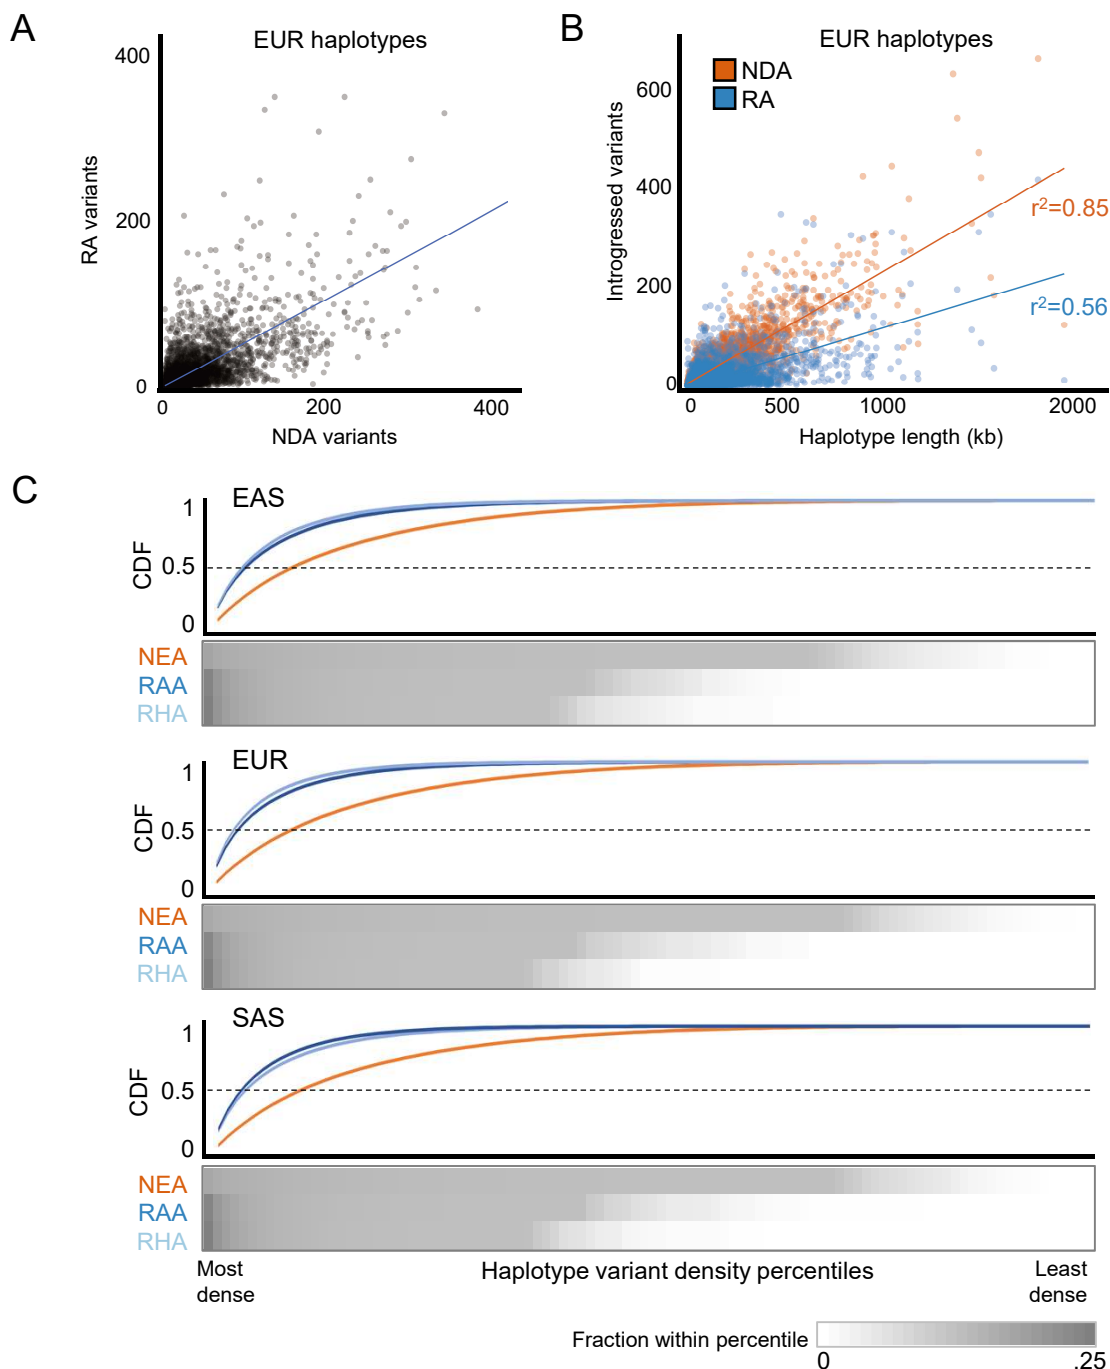

**Figure S5 Reintroduced alleles cluster within introgressed Neanderthal haplotypes.** (A) Scatter plot of the numbers of RAs and NDAs contained on all introgressed haplotypes in EUR. The correlation between the NDA and RA content is moderate (Pearson's  $r^2=0.46$ ), with 18% of the haplotypes containing no RAs and 10% having more RAs than NDAs. (B) Scatter plot of the number of introgressed variants on each haplotype vs. haplotype length. The NDA content of a haplotype is proportional to its length ( $r^2 = 0.85$ ), but the number of RAs in each haplotype is less strongly correlated with length ( $r^2 = 0.56$ ). (C) Heatmap of the fraction of NDAs and RAs in density percentiles (high to low, l-r) averaged over all introgressed Eurasian haplotypes. This information is summarized in a cumulative density function (CDF) above the heatmaps. A higher fraction of all RAs are found in the most dense percentiles; this reflects the fact that RAs are often present in more dense clusters than are NDAs.



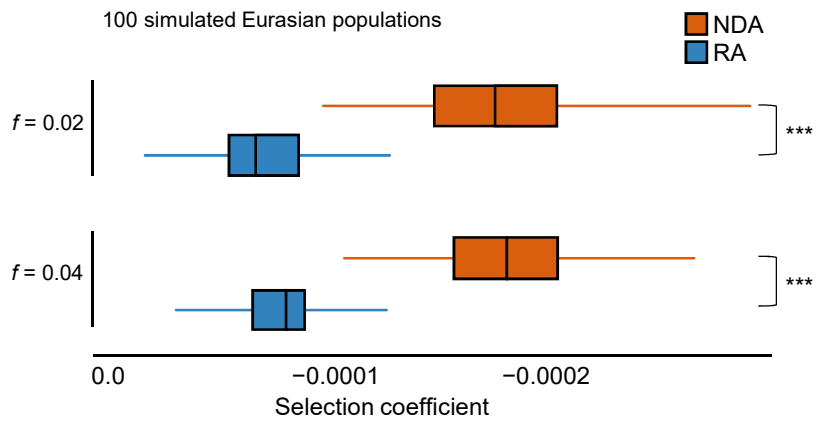

**Figure S6 Selection coefficients of simulated introgressed variants in Eurasians.**

Selection coefficients in Eurasians from SLiM simulations with high (0.04) and low (0.02) admixture fractions. Each boxplot summarizes the average selection coefficient of all alleles in each introgressed class in each of 100 simulated modern Eurasian populations

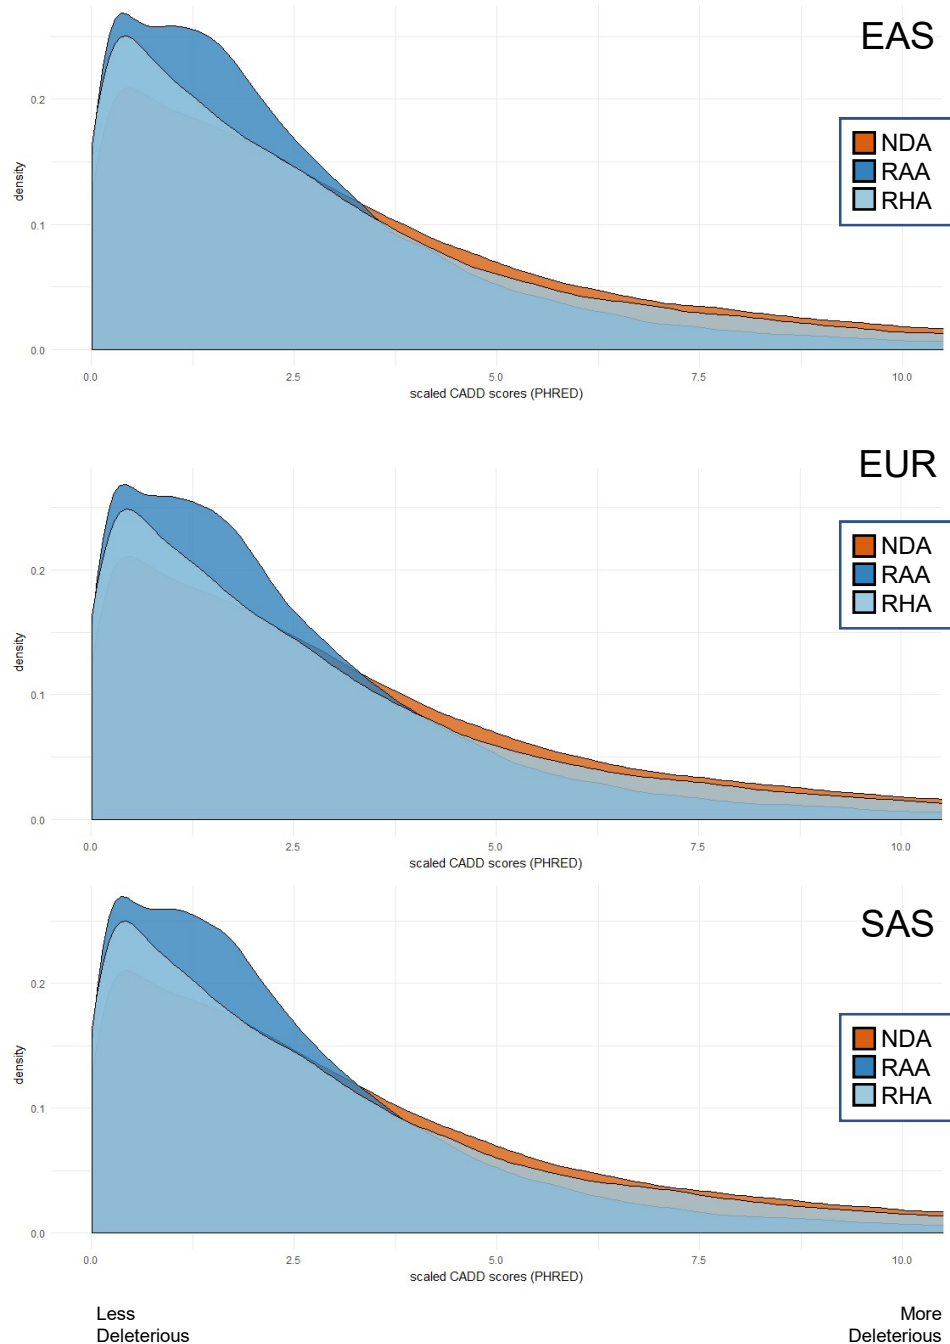

**Figure S7 CADD scores for RAs (stratified as RAA and RHA) and NDAs in each of three populations.** Normalized CADD scores for the introgressed variant classes (RAs and NDAs) with RAs stratified into RAA and RHAs. Considering RAA and RHA separately revealed that the RAAs are less deleterious than the RHAs (median scaled CADD score: RAA=1.91; RHA=2.23;  $P = 1.80e-89$ , Wilcoxon Rank Sum Test). This difference likely reflects the greater evolutionary conservation of RAAs. Results were similar across each superpopulation.

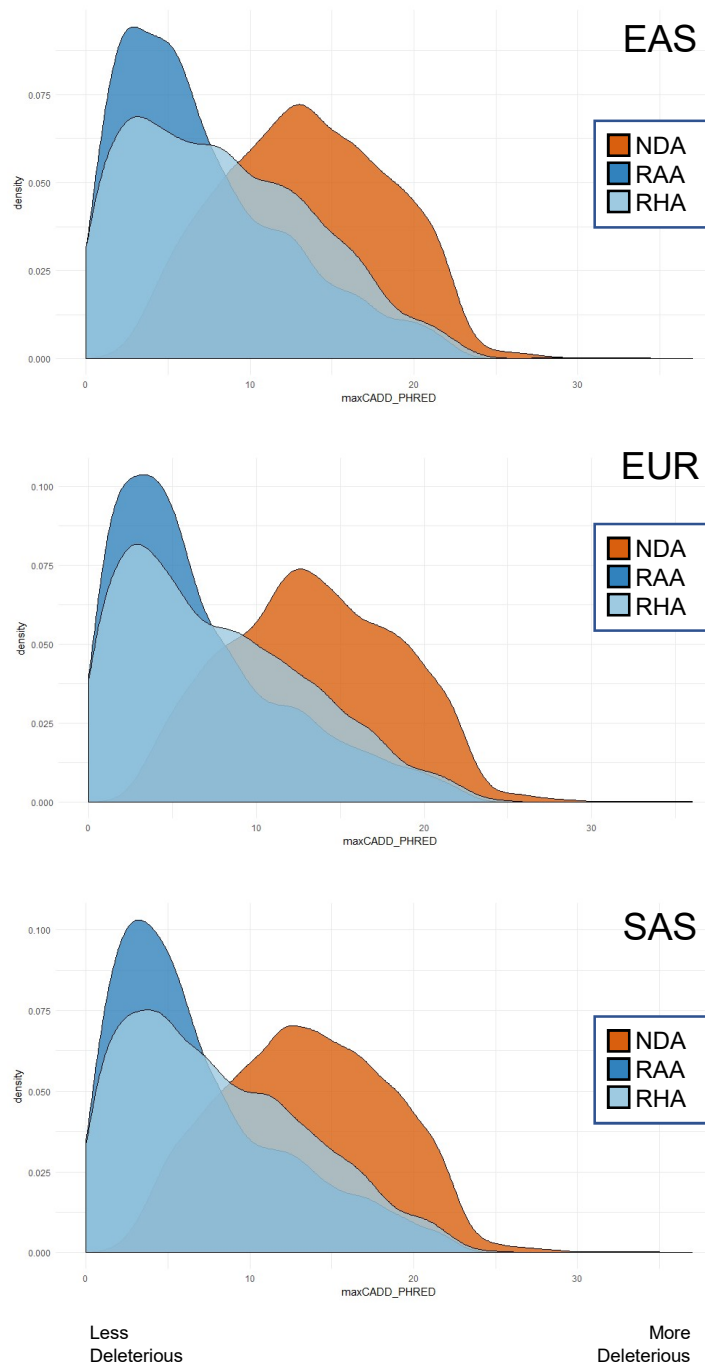

**Figure S8 Max scaled CADD score per introgressed haplotype.** Maximum scaled CADD scores on each introgressed haplotype for the introgressed variant classes in each superpopulation.

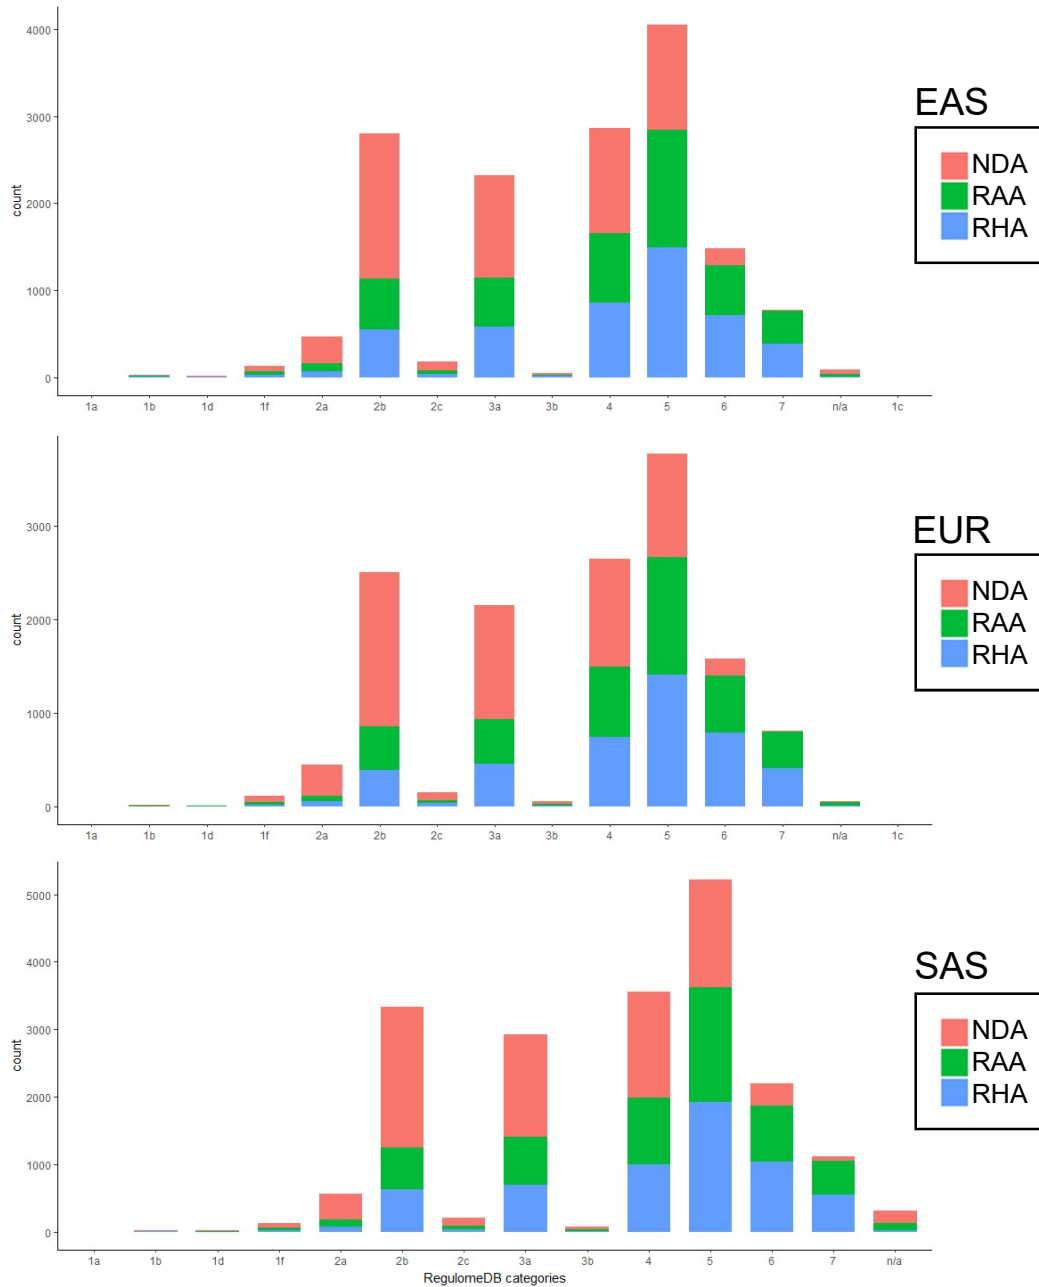

**Figure S9 RegulomeDB does not suggest a greater functional influence for NDAs compared to RAs.** Comparison of the fraction of NDAs and RAs in each of the RegulomeDB functional classes in order of evidence of regulatory activity.
